# Supplementary material
Source: ML conference proceedings conference paper supplement (https://openreview.net/forum?id=gwizseh-Iam)
Supplement: supplementary_material [file attachment]

## Sheet: Rice
Area	Perimeter	Major_Axis_Length	Minor_Axis_Length	Eccentricity	Convex_Area	Extent	Class
15231	525.579	229.75	85.0938	0.928882	15617	0.572896	Cammeo
14656	494.311	206.02	91.731	0.895405	15072	0.615436	Cammeo
14634	501.122	214.107	87.7683	0.912118	14954	0.693259	Cammeo
13176	458.343	193.337	87.4484	0.891861	13368	0.640669	Cammeo
14688	507.167	211.743	89.3125	0.906691	15262	0.646024	Cammeo
13479	477.016	200.053	86.6503	0.901328	13786	0.657897	Cammeo
15757	509.281	207.297	98.3361	0.880323	16150	0.589708	Cammeo
16405	526.57	221.613	95.4367	0.902521	16837	0.658888	Cammeo
14534	483.641	196.651	95.0507	0.875429	14932	0.649651	Cammeo
13485	471.57	198.273	87.7273	0.896789	13734	0.57232	Cammeo
14930	499.925	212.246	90.0175	0.905606	15248	0.624373	Cammeo
14626	496.586	204.534	92.9749	0.890712	15070	0.570214	Cammeo
15926	522.74	225.736	91.0571	0.915033	16240	0.779769	Cammeo
14076	479.677	199.489	90.71	0.890639	14434	0.781219	Cammeo
13500	476.915	202.547	85.4055	0.906755	13800	0.717703	Cammeo
14349	496.946	213.544	86.1608	0.914988	14678	0.666837	Cammeo
15209	496.565	214.05	91.0263	0.905073	15395	0.56937	Cammeo
15238	496.871	208.532	93.8284	0.893055	15487	0.732314	Cammeo
13509	480.466	207.137	83.9402	0.914211	13732	0.595635	Cammeo
13699	480.729	197.971	89.9491	0.890821	14178	0.672047	Cammeo
13921	481.993	203.445	88.1258	0.901313	14210	0.561331	Cammeo
14405	488.237	204.43	90.6265	0.896367	14742	0.763786	Cammeo
13377	472.961	199.941	86.6829	0.901133	13685	0.794831	Cammeo
15043	498.299	206.012	94.7667	0.887916	15414	0.586884	Cammeo
14590	496.172	212.101	88.6024	0.908568	14883	0.571485	Cammeo
13237	466.003	197.905	85.7096	0.901353	13445	0.592419	Cammeo
16226	524.205	216.873	96.6537	0.895198	16748	0.648625	Cammeo
13203	469.466	199.342	85.3896	0.903609	13431	0.601558	Cammeo
13328	473.044	201.399	85.2586	0.905975	13588	0.7801	Cammeo
14945	493.108	202.047	95.0794	0.882357	15357	0.739998	Cammeo
13130	467.922	196.147	86.2071	0.898241	13462	0.574818	Cammeo
13414	479.901	203.086	85.7369	0.906516	13735	0.714042	Cammeo
16104	507.429	206.071	100.754	0.872324	16457	0.605414	Cammeo
11827	455.221	194.784	78.4315	0.91535	12212	0.769987	Cammeo
14479	475.925	200.552	92.1781	0.888115	14696	0.711429	Cammeo
14306	482.248	197.686	94.0561	0.879561	14667	0.58795	Cammeo
14415	488.122	203.593	91.0347	0.894463	14758	0.674102	Cammeo
14415	490.066	206.539	90.0175	0.900025	14671	0.653327	Cammeo
14524	480.212	199.933	93.3121	0.884407	14808	0.611279	Cammeo
13780	497.428	221.723	79.9521	0.932723	14010	0.550781	Cammeo
12768	464.82	195.388	84.3599	0.901991	13085	0.582987	Cammeo
13047	486.369	213.194	79.2889	0.928269	13621	0.615425	Cammeo
14456	492.951	212.411	87.3601	0.91151	14726	0.795028	Cammeo
13973	474.008	192.349	93.7791	0.873097	14354	0.614198	Cammeo
13858	482.58	205.02	86.9647	0.90558	14154	0.555921	Cammeo
13148	481.722	201.519	84.5415	0.907745	13572	0.623749	Cammeo
12792	462.073	194.481	84.7309	0.900103	13032	0.593927	Cammeo
15778	515.273	214.038	95.4977	0.894947	16283	0.686298	Cammeo
15404	509.517	217.298	91.3975	0.907242	15696	0.633701	Cammeo
14911	494.089	207.56	92.4106	0.89542	15132	0.604762	Cammeo
15360	504.232	210.391	94.741	0.892873	15751	0.757658	Cammeo
15746	503.231	204.874	99.4487	0.874285	16171	0.753037	Cammeo
14304	489.037	211.027	86.8394	0.911406	14483	0.577729	Cammeo
15136	518.644	221.709	88.2076	0.917449	15469	0.529712	Cammeo
12919	475.26	201.816	83.2063	0.911053	13256	0.765162	Cammeo
15224	510.882	213.196	92.3234	0.901373	15686	0.63953	Cammeo
12950	468.57	196.617	84.8003	0.90221	13584	0.76181	Cammeo
13536	478.006	203.174	85.9106	0.906203	13810	0.552806	Cammeo
15551	508.407	217.016	92.1518	0.905366	15786	0.807425	Cammeo
14166	483.705	204.627	88.9924	0.900479	14412	0.766061	Cammeo
13916	478.878	201.64	88.561	0.898387	14221	0.603993	Cammeo
12308	451.609	193.268	81.6599	0.906352	12488	0.724043	Cammeo
15127	499.8	212.904	91.1516	0.903715	15370	0.713	Cammeo
14115	486.272	207.551	87.7811	0.906159	14422	0.600817	Cammeo
17313	531.984	225.535	98.4435	0.899709	17582	0.569881	Cammeo
15147	511.294	216.099	90.9464	0.907128	15637	0.534852	Cammeo
16419	531.421	224.066	94.5411	0.906626	16874	0.550419	Cammeo
13737	484.385	209.544	84.1657	0.915788	13944	0.605208	Cammeo
14053	497.052	216.192	84.1599	0.921118	14416	0.808387	Cammeo
11549	440.248	179.117	84.4958	0.88174	11961	0.595401	Cammeo
16490	520.319	212.011	101.68	0.877488	16873	0.629365	Cammeo
14011	475.873	197.729	91.1591	0.887384	14315	0.777611	Cammeo
15809	518.455	221.071	92.2323	0.908811	16079	0.814813	Cammeo
12473	470.34	202.443	79.0243	0.920665	12806	0.525976	Cammeo
15319	506.025	208.228	94.8387	0.890258	15813	0.573702	Cammeo
15498	512.704	215.808	92.624	0.903211	15914	0.578888	Cammeo
13902	479.232	201.115	89.1286	0.896436	14202	0.698698	Cammeo
14837	499.832	210.067	91.2686	0.900685	15263	0.680097	Cammeo
15113	493.738	206.566	94.1914	0.889987	15374	0.659035	Cammeo
16091	508.831	209.184	99.2318	0.880323	16431	0.670458	Cammeo
15543	507.385	211.651	94.5714	0.894621	15976	0.65293	Cammeo
13683	492.975	213.909	83.1207	0.921415	14070	0.761266	Cammeo
12161	445.048	182.335	86.2727	0.880979	12428	0.602806	Cammeo
13711	483.215	203.881	86.6269	0.905245	14097	0.561466	Cammeo
12518	473.384	203.922	80.0077	0.919818	12778	0.680326	Cammeo
13302	482.69	209.397	81.7489	0.920645	13827	0.595328	Cammeo
16418	534.99	230.159	91.7872	0.917038	16736	0.646276	Cammeo
14166	491.613	209.036	87.5246	0.908122	14386	0.602296	Cammeo
14988	499.355	212.262	90.9881	0.903466	15245	0.588688	Cammeo
14223	480.953	201.39	90.3859	0.893627	14441	0.641948	Cammeo
12518	460.722	195.651	82.3637	0.907073	12813	0.689887	Cammeo
12854	474.138	202.196	81.747	0.914628	13242	0.643279	Cammeo
15705	498.964	208.541	96.6372	0.886151	16009	0.773645	Cammeo
14451	487.22	201.295	92.7395	0.887548	14776	0.647272	Cammeo
14064	486.89	204.163	88.5214	0.901114	14388	0.64838	Cammeo
13524	487.469	208.153	83.6143	0.915773	13830	0.637925	Cammeo
13677	494.635	219.6	79.6317	0.931936	13936	0.532096	Cammeo
12921	476.746	206.223	80.4037	0.920862	13218	0.546921	Cammeo
13251	460.532	190.916	88.9976	0.8847	13528	0.749915	Cammeo
14601	505.249	215.934	86.7587	0.915735	14991	0.668544	Cammeo
15141	505.421	209.594	93.0924	0.895949	15559	0.5664	Cammeo
12599	455.281	188.016	86.3745	0.88823	12897	0.621252	Cammeo
14709	515.85	222.723	85.4316	0.923509	14941	0.524797	Cammeo
12047	455.608	195.666	80.2691	0.91198	12339	0.54403	Cammeo
13158	470.996	201.018	84.503	0.907351	13462	0.619783	Cammeo
15191	501.892	211.723	92.7857	0.898858	15492	0.568377	Cammeo
13837	483.594	204.311	87.2893	0.90414	14139	0.569424	Cammeo
13645	484.325	205.539	85.9219	0.908432	13972	0.547135	Cammeo
16199	511.228	210.002	99.4178	0.88084	16637	0.738265	Cammeo
13169	474.837	201.38	84.4871	0.907737	13505	0.547113	Cammeo
14022	483.019	204.483	88.5693	0.901328	14358	0.704729	Cammeo
12471	445.374	184.992	86.8598	0.882915	12688	0.671784	Cammeo
12706	463.451	194.181	84.8849	0.899393	13011	0.797314	Cammeo
14918	500.271	210.425	91.2105	0.901173	15185	0.640725	Cammeo
14641	505.002	211.584	90.0334	0.904948	15034	0.629558	Cammeo
15216	500.368	208.228	94.3026	0.891571	15558	0.573043	Cammeo
12349	467.665	202.688	78.675	0.921593	12572	0.548162	Cammeo
13584	478.057	203.837	85.4274	0.907942	13877	0.676326	Cammeo
14138	490.834	206.181	89.3673	0.901182	14523	0.762567	Cammeo
11956	438.896	184.644	83.2184	0.892677	12121	0.577027	Cammeo
10604	425.926	179.151	76.3517	0.904636	10830	0.574898	Cammeo
14592	494.44	212.68	88.2874	0.909767	14838	0.745631	Cammeo
12770	458.302	196.633	83.1953	0.906083	12949	0.60287	Cammeo
15143	504.14	207.734	94.1484	0.891401	15628	0.571326	Cammeo
12917	473.235	200.325	83.2012	0.909671	13302	0.666099	Cammeo
15714	501.155	205.013	99.2755	0.874935	16074	0.733888	Cammeo
14655	491.715	200.147	94.7805	0.880764	15181	0.60091	Cammeo
15639	499.139	207.98	96.2904	0.88637	15895	0.706784	Cammeo
15166	502.165	214.14	91.3851	0.904368	15475	0.794864	Cammeo
13742	493.854	212.608	84.8869	0.916836	14272	0.583227	Cammeo
13983	483.668	201.485	89.057	0.897014	14320	0.567492	Cammeo
11386	450.12	195.46	75.8429	0.92165	11612	0.51286	Cammeo
15636	513.227	214.384	93.9778	0.898798	15913	0.566276	Cammeo
13507	468.239	197.509	87.9296	0.895435	13735	0.577222	Cammeo
13186	477.334	201.597	84.67	0.907526	13516	0.541831	Cammeo
14013	458.911	181.951	99.4438	0.837433	14323	0.794388	Cammeo
16053	523.84	220.914	93.8917	0.905186	16496	0.747973	Cammeo
13557	483.909	206.204	84.3873	0.912426	13845	0.55258	Cammeo
13104	476.989	202.425	83.6133	0.910705	13464	0.538816	Cammeo
15167	514.231	220.547	88.9976	0.914965	15456	0.628033	Cammeo
14159	489.436	209.131	87.1147	0.909111	14410	0.547949	Cammeo
14436	485.826	204.47	90.7499	0.896111	14864	0.614481	Cammeo
15320	511.93	218.623	91.1698	0.908898	15740	0.545642	Cammeo
15341	504.463	210.872	93.9866	0.89518	15628	0.768972	Cammeo
14399	484.082	200.174	92.8516	0.885911	14849	0.604797	Cammeo
16835	522.535	216.272	100.433	0.885635	17404	0.735217	Cammeo
13655	471.525	193.196	91.5578	0.880573	14053	0.710976	Cammeo
14276	492.84	208.877	88.1211	0.906651	14706	0.582456	Cammeo
12199	454.404	191.91	82.1408	0.90377	12555	0.750523	Cammeo
12223	445.439	185.029	85.3715	0.887195	12460	0.796027	Cammeo
13884	491.618	207.654	86.3435	0.909454	14232	0.542365	Cammeo
15833	530.335	225.223	91.5111	0.913734	16337	0.586407	Cammeo
12861	471.921	193.251	86.4582	0.89434	13330	0.633422	Cammeo
15080	500.006	209.589	92.7967	0.896643	15614	0.732323	Cammeo
16898	526.944	217.872	100.345	0.887624	17274	0.624464	Cammeo
16254	532.778	223.549	94.1195	0.907049	16680	0.553686	Cammeo
14274	488.83	203.568	89.93	0.897129	14529	0.572357	Cammeo
13965	478.577	203.276	88.1075	0.901184	14135	0.807879	Cammeo
13860	484.772	200.777	88.8408	0.896775	14238	0.660881	Cammeo
13568	482.457	201.88	87.0739	0.902202	14068	0.635801	Cammeo
14546	494.168	212.314	87.8722	0.910332	14826	0.625742	Cammeo
16559	524.129	223.638	94.9479	0.905399	16961	0.775089	Cammeo
15308	513.99	219.468	90.0239	0.911999	15720	0.763263	Cammeo
14741	497.225	212.463	89.4537	0.907046	15036	0.553715	Cammeo
13397	474.865	200.546	86.3967	0.902444	13762	0.694037	Cammeo
15559	514.279	221.119	90.4638	0.912481	15903	0.775778	Cammeo
13665	482.077	208.964	84.6173	0.914345	13998	0.601214	Cammeo
15390	511.509	214.466	92.4572	0.902302	15788	0.773289	Cammeo
14017	471.814	194.643	92.3601	0.88025	14314	0.708788	Cammeo
14209	496.272	208.823	87.758	0.907408	14667	0.565735	Cammeo
14786	505.389	214.218	89.4266	0.908698	15177	0.734161	Cammeo
15540	516.316	217.387	92.4735	0.905012	16084	0.632479	Cammeo
17442	539.776	228.593	98.192	0.903044	17698	0.576252	Cammeo
17082	548.446	230.189	95.7576	0.909366	17576	0.592467	Cammeo
14195	488.46	203.513	89.9587	0.897	14555	0.717354	Cammeo
15172	504.158	213.225	91.6671	0.902873	15477	0.622441	Cammeo
14434	486.668	201.272	92.7338	0.887536	14754	0.625987	Cammeo
12863	457.191	195.7	84.5008	0.901976	13023	0.808587	Cammeo
14019	475.755	194.518	92.817	0.878814	14308	0.59112	Cammeo
15888	518.555	218.194	94.0569	0.902319	16245	0.557532	Cammeo
13000	460.371	195.099	85.7226	0.898301	13231	0.582855	Cammeo
14806	509.376	214.142	89.6917	0.908059	15594	0.708794	Cammeo
14713	493.212	206.916	91.6485	0.896558	15162	0.594033	Cammeo
13722	482.343	202.278	87.7539	0.900996	14189	0.605667	Cammeo
15713	518.452	218.767	92.4292	0.906363	16038	0.583519	Cammeo
12765	460.346	196.391	83.899	0.904155	13139	0.574353	Cammeo
13487	473.722	197.12	87.7846	0.895363	13773	0.751407	Cammeo
15252	501.332	207.524	94.2731	0.890861	15595	0.591713	Cammeo
13684	464.566	189.531	92.9057	0.871617	13928	0.605648	Cammeo
14709	489.529	204.923	91.8657	0.893887	15041	0.6398	Cammeo
14331	502.03	212.581	87.3581	0.911663	14618	0.542759	Cammeo
15475	511.797	220.477	90.2072	0.912469	15734	0.827319	Cammeo
14368	491.563	211.297	87.208	0.910855	14596	0.624424	Cammeo
13670	486.81	207.742	84.5777	0.913371	13923	0.58096	Cammeo
14232	505.885	214.103	86.4141	0.914931	14702	0.52602	Cammeo
14441	495.366	210.023	89.203	0.90532	14805	0.540214	Cammeo
14093	488.598	204.392	89.1596	0.899841	14463	0.581107	Cammeo
15121	503.487	212.939	91.3305	0.903349	15470	0.783796	Cammeo
15569	528.789	221.577	90.9824	0.91181	16286	0.565693	Cammeo
15684	513.891	221.945	90.8251	0.912434	15944	0.78201	Cammeo
14622	481.616	200.054	94.3836	0.88171	14845	0.608946	Cammeo
14850	509.275	215.963	89.1265	0.91087	15372	0.799419	Cammeo
14017	491.098	212.428	84.6909	0.91709	14287	0.762125	Cammeo
11513	438.625	189.722	77.6855	0.912324	11736	0.684239	Cammeo
14793	501.304	211.601	90.1125	0.904789	15049	0.664525	Cammeo
14466	497.84	204.41	91.2148	0.894916	14885	0.656501	Cammeo
12162	454.776	191.121	82.3174	0.902491	12493	0.745221	Cammeo
17180	547.215	238.435	93.0149	0.92077	17517	0.572209	Cammeo
13831	483.616	202.876	88.2909	0.900335	14270	0.591068	Cammeo
13925	478.29	196.575	91.4311	0.885247	14323	0.66278	Cammeo
14045	482.742	200.027	90.7138	0.891252	14305	0.572611	Cammeo
16588	531.395	221.885	96.6526	0.900142	16854	0.578988	Cammeo
14966	499.638	205.475	93.3816	0.890763	15387	0.58143	Cammeo
16011	525.069	222.946	92.3825	0.910108	16298	0.556633	Cammeo
14050	481.251	191.824	95.062	0.868569	14600	0.607699	Cammeo
14173	480.683	201.936	90.245	0.894584	14519	0.597563	Cammeo
14106	487.252	209.569	86.5552	0.910724	14348	0.542705	Cammeo
15967	511.615	211.691	96.9752	0.888901	16329	0.586677	Cammeo
11667	447.525	186.671	80.8429	0.901357	12039	0.667296	Cammeo
14890	502.541	206.229	93.4573	0.891422	15349	0.58982	Cammeo
13279	474.236	200.545	85.0081	0.905715	13757	0.728495	Cammeo
13942	502.031	214.338	83.7197	0.920562	14273	0.644508	Cammeo
13545	482.736	208.803	83.3052	0.916966	13759	0.532555	Cammeo
14126	498.425	216.885	83.8104	0.92232	14410	0.760771	Cammeo
14530	487.097	201.806	93.059	0.887332	14926	0.687128	Cammeo
13708	486.396	204.624	86.3397	0.906622	14361	0.580675	Cammeo
14252	493.114	202.655	91.3097	0.892742	14627	0.563766	Cammeo
14571	489.731	202.394	92.9421	0.888326	14884	0.584899	Cammeo
16194	528.121	226.874	91.6352	0.914802	16524	0.552018	Cammeo
14356	492.022	209.376	88.5943	0.906066	14652	0.576824	Cammeo
15691	511.849	213.612	94.9193	0.895851	16124	0.659147	Cammeo
14105	496.228	209.275	86.9419	0.909619	14567	0.603707	Cammeo
14013	478.277	194.783	92.9503	0.878794	14374	0.604009	Cammeo
15009	502.488	211.09	91.7615	0.900574	15370	0.615754	Cammeo
13954	484.532	203.678	88.2087	0.901356	14288	0.750861	Cammeo
16226	517.684	217.081	95.9384	0.897041	16466	0.583145	Cammeo
14505	492.682	205.412	90.7626	0.897086	14834	0.582952	Cammeo
15281	509.517	212.697	92.9938	0.899358	15689	0.64023	Cammeo
15009	507.417	217.133	88.9249	0.912292	15387	0.598588	Cammeo
14652	485.547	201.554	93.4486	0.886023	14883	0.59315	Cammeo
15330	501.697	209.679	93.8727	0.894185	15617	0.582624	Cammeo
14407	482.796	202.832	91.1919	0.893234	14671	0.742629	Cammeo
15741	523.776	227.502	89.1244	0.920071	15999	0.563225	Cammeo
14589	495.93	210.284	89.4249	0.905072	14853	0.665101	Cammeo
16376	531.001	227.945	92.6685	0.913633	16667	0.741767	Cammeo
14294	484.194	205.128	89.0013	0.90097	14542	0.70445	Cammeo
14541	492.785	204.257	92.471	0.891653	14893	0.758292	Cammeo
16734	531.507	220.695	97.8393	0.896362	17242	0.657111	Cammeo
13434	483.365	204.568	84.156	0.911462	13773	0.722258	Cammeo
14878	506.021	212.182	90.4387	0.904614	15237	0.575774	Cammeo
14504	502.507	212.248	87.9321	0.910145	14895	0.553419	Cammeo
14723	491.055	204.176	93.0655	0.890077	15021	0.575679	Cammeo
15830	520.51	219.448	92.6646	0.906473	16121	0.595113	Cammeo
14549	485.494	199.757	93.6483	0.883299	14846	0.619238	Cammeo
14700	506.464	215.43	87.7601	0.913263	15050	0.707547	Cammeo
14842	505.726	214.955	88.6609	0.910974	15313	0.544501	Cammeo
14400	486.9	200.138	93.2465	0.884831	14714	0.618132	Cammeo
12892	473.527	199.939	83.2355	0.909225	13193	0.564547	Cammeo
16588	519.559	218.394	97.6669	0.894432	16852	0.640068	Cammeo
15676	512.335	214.768	93.7219	0.899759	15961	0.77928	Cammeo
16706	533.626	228.156	94.2075	0.910773	17037	0.636249	Cammeo
14301	497.774	209.876	87.2994	0.909385	14591	0.60068	Cammeo
15070	504.051	210.026	92.3732	0.898087	15400	0.64873	Cammeo
15381	503.579	211.884	93.3097	0.89781	15749	0.740325	Cammeo
15252	502.591	211.631	92.1962	0.900118	15495	0.574463	Cammeo
14887	493.045	199.165	96.6937	0.874239	15347	0.617129	Cammeo
14493	506.841	219.003	84.9193	0.921763	14804	0.541107	Cammeo
14897	491.185	205.72	92.8757	0.892288	15137	0.594453	Cammeo
14690	506.855	214.159	88.876	0.909822	15064	0.584397	Cammeo
13950	476.337	193.635	92.9442	0.877271	14280	0.715641	Cammeo
14421	507.805	213.886	86.8762	0.913793	14881	0.650943	Cammeo
14517	495.615	211.803	88.0325	0.909532	14815	0.687521	Cammeo
14944	500.238	209.558	91.5284	0.899573	15255	0.628956	Cammeo
14570	469.982	185.401	100.888	0.838982	14895	0.654537	Cammeo
11838	440.256	181.323	83.8384	0.886687	12165	0.601524	Cammeo
15223	514.907	220.369	89.4364	0.91394	15492	0.550282	Cammeo
13694	464.56	191.331	91.7078	0.877643	13918	0.708799	Cammeo
17948	526.918	214.094	107.542	0.864685	18322	0.66637	Cammeo
14471	503.674	207.929	90.1602	0.9011	14894	0.554955	Cammeo
16654	519.036	217.25	98.9996	0.890136	16976	0.763385	Cammeo
14990	507.785	213.485	90.1763	0.906409	15318	0.565917	Cammeo
16934	533.086	225.303	96.4501	0.903736	17323	0.752622	Cammeo
16030	512.853	210.247	97.6313	0.885645	16306	0.5978	Cammeo
15035	486.653	198.22	97.8575	0.869643	15279	0.623755	Cammeo
16008	521.007	222.845	92.1295	0.910539	16315	0.61188	Cammeo
14362	504.577	211.293	88.2659	0.908566	14724	0.54186	Cammeo
15815	506.29	210.505	96.5024	0.888729	16112	0.795843	Cammeo
14131	490.701	206.927	88.284	0.90442	14519	0.752931	Cammeo
12619	470.614	202.765	80.1795	0.918495	12937	0.607939	Cammeo
13792	475.782	196.707	90.3471	0.888282	14183	0.773268	Cammeo
14573	493.78	209.356	89.4375	0.904156	14847	0.65058	Cammeo
14345	491.019	207.22	88.9111	0.903273	14650	0.592622	Cammeo
13166	461.939	185.6	91.2936	0.870661	13562	0.656331	Cammeo
11794	456.323	194.043	78.7987	0.913834	12116	0.65348	Cammeo
13782	471.131	194.438	90.9785	0.883779	14000	0.596623	Cammeo
14533	487.204	196.815	95.8431	0.873418	14873	0.65112	Cammeo
12557	443.219	175.597	92.3386	0.850575	12860	0.622867	Cammeo
16431	509.385	208.053	101.961	0.87168	16875	0.732219	Cammeo
11940	443.968	187.334	82.1828	0.898635	12184	0.636393	Cammeo
15856	509.02	210.164	97.7602	0.885226	16160	0.762674	Cammeo
15636	504.182	212.136	94.4893	0.895323	15927	0.744997	Cammeo
14787	492.313	209.679	90.4677	0.902133	15066	0.795684	Cammeo
16412	508.367	210.575	99.9942	0.88006	16759	0.730591	Cammeo
15137	494.605	206.459	93.9902	0.890364	15400	0.761725	Cammeo
16199	514.156	217.631	95.5194	0.898533	16475	0.707689	Cammeo
15375	515.423	215.999	91.6169	0.90559	15780	0.597598	Cammeo
11447	447.346	190.389	79.0382	0.909757	11753	0.543542	Cammeo
16094	504.126	208.371	99.0303	0.879846	16325	0.648533	Cammeo
11784	438.12	181.758	83.7444	0.887532	11981	0.803765	Cammeo
15517	481.378	194.638	102.058	0.851502	15718	0.650117	Cammeo
15065	506.82	212.437	91.3703	0.902779	15516	0.724627	Cammeo
15529	509.017	207.051	96.9881	0.883503	15993	0.599737	Cammeo
13584	478.537	204.621	84.8061	0.91007	13817	0.676023	Cammeo
12618	457.898	193.816	83.4774	0.902493	12851	0.582226	Cammeo
13253	473.442	198.611	85.9189	0.901586	13535	0.689973	Cammeo
15907	527.211	224.252	91.4411	0.913089	16206	0.547667	Cammeo
13084	473.767	195.838	86.3799	0.897469	13453	0.588045	Cammeo
15367	501.907	210.056	94.4792	0.893139	15644	0.790606	Cammeo
13319	468.232	192.927	89.3376	0.886325	13694	0.695219	Cammeo
15715	511.25	210.912	96.0047	0.890395	16096	0.581413	Cammeo
12745	453.035	187.006	87.6673	0.883307	13040	0.605176	Cammeo
14400	481.506	193.783	96.5162	0.867141	14876	0.683891	Cammeo
14329	486.277	206.572	89.2124	0.901936	14588	0.812762	Cammeo
14818	487.016	197.829	97.3861	0.87044	15261	0.632599	Cammeo
13391	486.122	213.112	80.9944	0.924964	13661	0.520241	Cammeo
14500	495.107	214.288	86.6611	0.914576	14712	0.581209	Cammeo
15815	504.224	214.655	94.988	0.896761	16059	0.80978	Cammeo
12089	439.492	183.577	84.6947	0.887214	12302	0.814513	Cammeo
14746	504.314	220.343	85.9316	0.920819	14995	0.797512	Cammeo
13569	490.542	209.849	83.4064	0.91762	14061	0.530039	Cammeo
15198	499.626	210.633	92.946	0.897375	15521	0.746097	Cammeo
12720	472.234	201.641	82.2284	0.913073	13352	0.74508	Cammeo
14229	485.119	206.598	88.7213	0.903095	14455	0.745169	Cammeo
13567	481.405	202.02	86.4185	0.903886	13976	0.750927	Cammeo
13431	482.53	212.451	81.1855	0.924105	13786	0.777977	Cammeo
12985	466.135	196.666	84.6931	0.902522	13221	0.588889	Cammeo
15725	515.258	221.66	91.2317	0.911372	16027	0.600489	Cammeo
15486	509.136	211.114	94.8222	0.893455	15921	0.686345	Cammeo
14674	497.103	208.436	91.087	0.899461	15049	0.682289	Cammeo
13286	480.071	202.548	85.117	0.907418	13633	0.550145	Cammeo
15398	513.023	214.054	93.6845	0.899137	15936	0.695044	Cammeo
14145	486.608	209.353	86.7895	0.910022	14370	0.766667	Cammeo
16412	515.115	208.695	101.942	0.872579	16857	0.773786	Cammeo
15094	506.507	217.938	89.0956	0.912619	15346	0.668557	Cammeo
15360	515.298	220.922	89.9555	0.913347	15662	0.641604	Cammeo
13567	473.575	195.353	89.2371	0.88957	14020	0.646787	Cammeo
13413	475.39	196.857	87.7882	0.895058	13917	0.571009	Cammeo
15236	497.277	209.162	94.0653	0.893167	15563	0.763709	Cammeo
15028	498.829	205.538	94.5842	0.887827	15382	0.577778	Cammeo
15249	506.05	212.091	92.4942	0.899895	15582	0.783044	Cammeo
14363	499.171	210.246	88.1118	0.907945	14669	0.606853	Cammeo
14988	491.707	205.061	94.857	0.886577	15270	0.582013	Cammeo
14318	477.494	195.024	94.5947	0.874491	14585	0.760867	Cammeo
14456	497.988	210.532	88.8843	0.906508	14865	0.678049	Cammeo
15857	515.322	219.965	93.1543	0.905898	16109	0.699162	Cammeo
15037	501.467	208.906	92.3046	0.89709	15452	0.578613	Cammeo
12286	444.887	183.289	86.7311	0.880958	12583	0.681874	Cammeo
16990	535.339	224.087	98.6626	0.897857	17371	0.600905	Cammeo
14172	500.429	218.572	83.3639	0.924409	14399	0.608815	Cammeo
15074	497.178	205.64	94.6222	0.887849	15536	0.721106	Cammeo
17353	539.034	220.961	101.454	0.888359	17845	0.630308	Cammeo
13415	470.355	197.03	87.6526	0.895595	13629	0.582248	Cammeo
16085	520.706	217.496	95.4056	0.898656	16514	0.702709	Cammeo
14023	491.669	211.159	85.5014	0.914355	14262	0.539139	Cammeo
13687	481.745	201.175	87.9572	0.899355	13979	0.698316	Cammeo
14758	500.01	206.285	92.7249	0.893281	15166	0.582399	Cammeo
14944	490.044	201.347	96.0463	0.878892	15305	0.610657	Cammeo
16182	509.922	211.165	98.3133	0.885008	16522	0.748128	Cammeo
14413	502.05	211.992	88.6478	0.90837	14826	0.576082	Cammeo
14321	494.345	211.669	86.8254	0.911998	14583	0.561278	Cammeo
15276	506.685	212.136	93.0638	0.898634	15574	0.579229	Cammeo
14407	494.99	208.749	88.6629	0.905318	14716	0.573756	Cammeo
13272	471.9	201.495	84.1538	0.908609	13492	0.565729	Cammeo
14965	483.508	203.523	94.3112	0.886153	15151	0.775549	Cammeo
16122	539	233.914	89.5311	0.923851	16440	0.51116	Cammeo
14969	515.098	222.045	87.4367	0.919205	15269	0.546214	Cammeo
12347	475.39	207.097	77.0804	0.928155	12857	0.520948	Cammeo
13816	484.276	199.013	89.8662	0.892241	14356	0.642455	Cammeo
12991	472.829	196.897	85.4954	0.90081	13380	0.736451	Cammeo
13606	480.946	204.29	85.2839	0.908693	13861	0.583698	Cammeo
14340	499.096	207.251	89.859	0.901117	14863	0.663152	Cammeo
14360	494.457	205.097	90.117	0.898298	14825	0.657509	Cammeo
13675	478.607	194.803	90.3222	0.886014	14146	0.58142	Cammeo
14489	496.385	210.036	88.5316	0.906826	14843	0.615349	Cammeo
14751	499.021	214.037	88.6286	0.91024	14955	0.552679	Cammeo
15136	503.26	208.772	94.0688	0.892735	15471	0.595905	Cammeo
13132	480.019	199.253	85.4197	0.903447	13594	0.580908	Cammeo
13689	483.655	202.722	86.9403	0.903369	14183	0.776461	Cammeo
14412	490.324	207.476	89.6895	0.901735	14703	0.598853	Cammeo
12901	475.303	209.586	79.2689	0.925717	13219	0.682809	Cammeo
13920	480.112	195.67	92.5484	0.881072	14350	0.577114	Cammeo
13410	483.152	205.876	84.6506	0.911557	13866	0.731428	Cammeo
12865	460.666	193.348	85.7244	0.89634	13120	0.634557	Cammeo
12859	462.872	193.342	85.909	0.89586	13279	0.708915	Cammeo
16523	531.892	224.995	94.4177	0.907689	16911	0.577041	Cammeo
15488	507.883	206.64	96.8721	0.883306	15968	0.602552	Cammeo
9908	432.769	188.188	67.6953	0.933059	10205	0.61168	Cammeo
13418	474.901	194.546	89.7083	0.887339	13973	0.604306	Cammeo
15558	511.718	213.978	94.4647	0.897276	15926	0.632439	Cammeo
13244	467.644	193.425	88.6365	0.888825	13672	0.797927	Cammeo
14064	488.948	206.933	87.4786	0.906252	14315	0.758576	Cammeo
15830	520.782	215.139	95.1715	0.896832	16326	0.610513	Cammeo
15813	495.268	203.795	99.6877	0.872195	16095	0.735249	Cammeo
16155	515.28	217.605	95.4846	0.898586	16418	0.583318	Cammeo
15593	512.428	216.616	92.91	0.903344	16050	0.777473	Cammeo
13234	472.35	198.575	86.2644	0.900712	13512	0.742649	Cammeo
14862	507.49	216.32	88.6025	0.91227	15125	0.775274	Cammeo
13375	474.087	198.769	86.6868	0.899889	13768	0.696324	Cammeo
13077	472.905	203.445	82.5701	0.913935	13405	0.627375	Cammeo
14947	506.651	214.344	89.5269	0.908595	15364	0.562997	Cammeo
14588	502.569	214.896	88.2073	0.911876	14923	0.536146	Cammeo
11981	448.827	190.129	81.3244	0.903905	12154	0.562092	Cammeo
12461	454.096	191.915	83.6612	0.899981	12683	0.561509	Cammeo
13980	479.18	206.329	87.0367	0.906673	14137	0.86105	Cammeo
14680	502.904	217.195	87.0028	0.916264	15000	0.580857	Cammeo
13272	474.927	195.779	87.1652	0.89542	13597	0.586064	Cammeo
14817	502.583	211.529	90.3852	0.904113	15113	0.568028	Cammeo
13080	474.26	198.957	84.7501	0.904737	13511	0.702772	Cammeo
16519	533.218	224.202	95.2169	0.905338	17041	0.740762	Cammeo
13787	476.896	201.338	88.1645	0.899027	14045	0.575994	Cammeo
16019	509.013	214.791	96.1242	0.894272	16248	0.657594	Cammeo
12714	461.89	196.56	83.1124	0.906207	12900	0.641409	Cammeo
12509	464.509	201.531	79.6508	0.918583	12703	0.544817	Cammeo
15437	512.948	211.409	94.9148	0.89355	15984	0.731611	Cammeo
12927	453.015	184.324	89.8613	0.873112	13196	0.736917	Cammeo
13682	488.9	199.56	89.4422	0.893934	14457	0.599667	Cammeo
14317	499.111	206.779	89.8253	0.900719	14815	0.804235	Cammeo
16190	529.661	224.387	93.1074	0.909848	16530	0.534818	Cammeo
14788	480.962	199.063	95.5379	0.877302	15044	0.657507	Cammeo
14795	497.516	213.603	89.8462	0.907236	15002	0.803072	Cammeo
14625	492.952	206.589	91.4308	0.896733	14972	0.739533	Cammeo
14982	505.078	217.365	88.5952	0.913166	15325	0.559238	Cammeo
15118	514.967	224.187	87.6922	0.920324	15454	0.654119	Cammeo
14337	494.299	206.693	89.7482	0.900811	14859	0.709893	Cammeo
13969	486.509	206.029	87.7261	0.904819	14277	0.652757	Cammeo
12333	463.155	196.599	81.6015	0.909792	12705	0.592022	Cammeo
15200	502.588	214.134	91.1175	0.90495	15461	0.624127	Cammeo
12292	457.286	194.888	80.9909	0.909558	12561	0.563827	Cammeo
15290	519.317	221.43	88.8773	0.915912	15699	0.661561	Cammeo
13858	490.57	203.709	88.1739	0.90147	14265	0.653186	Cammeo
16259	522.622	215.509	97.4215	0.891991	16728	0.584352	Cammeo
15929	513.94	212.658	96.998	0.889917	16293	0.72586	Cammeo
12580	479.217	208.424	77.7403	0.927835	12879	0.573068	Cammeo
13269	485.615	207.122	83.324	0.915511	13741	0.71477	Cammeo
13893	474.134	200.736	89.17	0.89592	14123	0.569339	Cammeo
13724	481.771	200.893	88.1683	0.898544	14038	0.679541	Cammeo
11689	444.898	191.936	78.1	0.91347	11935	0.549295	Cammeo
15676	511.666	215.814	93.5657	0.90113	16016	0.77928	Cammeo
14401	482.176	203.072	91.3516	0.893105	14608	0.716503	Cammeo
13731	489.058	212.435	82.9147	0.920686	14014	0.591726	Cammeo
14274	499.088	214.403	85.2468	0.917558	14559	0.656729	Cammeo
13445	490.815	216.173	79.6001	0.929737	13640	0.535444	Cammeo
12800	471.334	203.559	81.3086	0.916762	13141	0.611621	Cammeo
14683	493.572	209.052	90.5843	0.901245	14947	0.7022	Cammeo
13846	479.587	197.005	90.9155	0.887146	14200	0.717558	Cammeo
14352	484.084	203.497	91.2685	0.893782	14656	0.568059	Cammeo
14071	479.093	197.405	92.301	0.883955	14398	0.598995	Cammeo
14476	489.238	203.859	91.6615	0.893214	14807	0.679848	Cammeo
13516	483.689	207.532	83.6857	0.915093	13746	0.700856	Cammeo
12346	456.905	193.613	82.0356	0.905798	12529	0.586731	Cammeo
13092	465.437	197.042	85.8356	0.90013	13369	0.768851	Cammeo
12860	469.559	197.661	84.1171	0.904929	13269	0.56453	Cammeo
13746	483.82	205.842	86.1887	0.908119	14060	0.715937	Cammeo
13277	486.956	201.839	85.2599	0.906403	13771	0.611055	Cammeo
15651	512.292	212.773	95.7254	0.893082	16022	0.572039	Cammeo
16094	509.979	215.548	95.6167	0.896225	16403	0.758793	Cammeo
15694	506.506	211.835	96.0225	0.891364	16010	0.57654	Cammeo
14254	500.494	213.075	86.7843	0.913297	14644	0.622853	Cammeo
12801	459.424	195.099	84.7996	0.9006	13058	0.761602	Cammeo
14646	511.452	220.483	85.6317	0.921498	14999	0.636672	Cammeo
14805	499.637	214.282	89.1741	0.909295	15090	0.576788	Cammeo
14811	512.11	217.738	87.4834	0.915735	15090	0.549166	Cammeo
16513	525.984	219.275	97.9517	0.894681	16950	0.610146	Cammeo
12149	455.562	191.446	82.0587	0.903482	12510	0.714227	Cammeo
13457	483.614	211.012	81.8744	0.921656	13763	0.673119	Cammeo
13066	478.002	207.517	80.5157	0.921661	13348	0.557804	Cammeo
13293	470.266	197.959	86.0761	0.900519	13553	0.713756	Cammeo
11935	464.933	196.535	79.723	0.914032	12358	0.566633	Cammeo
12986	462.111	195.518	86.1085	0.897795	13288	0.790576	Cammeo
14003	489.29	208.333	87.1922	0.908206	14421	0.579115	Cammeo
12377	465.047	197.081	81.9223	0.909512	12669	0.629681	Cammeo
12840	466.903	198.156	83.2343	0.907504	13091	0.591378	Cammeo
13819	487.67	207.971	86.1877	0.910085	14181	0.569691	Cammeo
14755	499.818	202.612	95.5161	0.881907	15123	0.600529	Cammeo
14485	495.466	212.002	88.2376	0.909268	14745	0.645097	Cammeo
14478	469.161	190.848	97.3432	0.860141	14686	0.765424	Cammeo
16933	521.922	221.333	98.0983	0.896415	17212	0.776743	Cammeo
14363	493.261	210.57	87.4158	0.909758	14621	0.577059	Cammeo
13927	479.355	202.794	88.4832	0.899791	14264	0.770853	Cammeo
15303	505.928	209.62	94.157	0.893441	15746	0.624612	Cammeo
14060	496.035	211.376	85.9353	0.913627	14448	0.672599	Cammeo
12682	459.965	195.436	83.6043	0.903881	12892	0.582812	Cammeo
13059	456.441	185.982	90.2045	0.874505	13339	0.619438	Cammeo
14557	492.413	205.107	91.4497	0.895101	14961	0.735648	Cammeo
13582	476.666	199.452	88.4087	0.896394	13825	0.568999	Cammeo
13678	472.123	200.254	88.0267	0.898205	13879	0.57884	Cammeo
11589	449.361	196.647	75.9796	0.922341	11783	0.562928	Cammeo
13681	485.413	205.006	86.4877	0.906653	14146	0.559894	Cammeo
13919	482.349	204.294	87.6541	0.903277	14274	0.748978	Cammeo
13439	477.75	199.382	87.6274	0.898245	13852	0.751244	Cammeo
13693	479.479	200.397	88.1745	0.897999	14097	0.695253	Cammeo
13870	484.127	203.418	88.5032	0.900392	14266	0.756518	Cammeo
15285	516.467	216.28	91.3466	0.906432	15704	0.587885	Cammeo
16263	546.562	230.96	91.6509	0.917894	16796	0.571233	Cammeo
14295	489.215	203.302	90.61	0.895187	14660	0.606697	Cammeo
14720	494.862	207.093	91.4989	0.897101	15071	0.704003	Cammeo
15550	505.763	211.379	94.4161	0.8947	15896	0.718842	Cammeo
15189	506.822	209.19	93.6198	0.894266	15629	0.674078	Cammeo
12832	464.526	196.611	83.9869	0.90417	13148	0.562906	Cammeo
14146	481.186	202.587	89.9449	0.896036	14495	0.603601	Cammeo
13006	486.707	213.128	78.4564	0.929779	13399	0.622446	Cammeo
15196	501.303	212.33	92.0054	0.901243	15463	0.768406	Cammeo
14517	488.324	196.164	95.5829	0.873258	14976	0.59513	Cammeo
13964	480.026	199.823	90.0655	0.892662	14298	0.657748	Cammeo
12414	453.383	188.562	85.3258	0.891761	12721	0.588174	Cammeo
13818	475.017	198.499	89.0957	0.893609	14008	0.596014	Cammeo
11530	458.712	197.876	75.382	0.924593	11918	0.700316	Cammeo
16436	529.863	230.931	91.0652	0.918965	16648	0.634105	Cammeo
11809	455.083	185.42	83.6138	0.892553	12318	0.648846	Cammeo
14818	499.36	208.876	91.9108	0.897985	15204	0.575412	Cammeo
12368	455.024	195.939	80.8091	0.910994	12573	0.796907	Cammeo
11491	440.469	183.995	80.8709	0.898229	11819	0.664988	Cammeo
11493	447.154	185.531	79.7523	0.902896	11801	0.570089	Cammeo
13235	465.816	193.546	88.6394	0.888964	13629	0.565477	Cammeo
16593	524.838	218.104	97.8526	0.893707	16814	0.593285	Cammeo
15326	505.378	208.099	95.3577	0.888833	15684	0.586215	Cammeo
15385	505.578	211.73	94.1233	0.895757	15726	0.587909	Cammeo
12907	465.342	195.655	84.8822	0.900992	13151	0.573339	Cammeo
13413	465.605	198.853	86.0942	0.901416	13620	0.635326	Cammeo
14369	491.044	207.947	89.1221	0.903504	14679	0.603993	Cammeo
13907	485.72	202.581	89.2024	0.897836	14358	0.555724	Cammeo
14577	489.908	204.846	91.2335	0.895344	14870	0.781399	Cammeo
15168	504.98	212.826	91.6198	0.902595	15432	0.583654	Cammeo
15159	515.131	216.062	91.0257	0.906924	15685	0.650713	Cammeo
16024	527.421	226.263	91.6011	0.914386	16355	0.535687	Cammeo
13200	472.465	203.314	83.5789	0.911598	13467	0.7453	Cammeo
12396	460.002	195.323	81.9296	0.907775	12676	0.733057	Cammeo
13201	461.519	192.885	87.8333	0.890304	13408	0.634908	Cammeo
14843	510.102	220.036	86.5014	0.919486	15155	0.533154	Cammeo
14331	495.143	212.029	86.8613	0.912235	14723	0.665784	Cammeo
16606	516.365	211.594	101.77	0.876738	17032	0.70712	Cammeo
15953	522.186	220.755	93.0421	0.906842	16307	0.789362	Cammeo
12072	452.262	192.722	80.2884	0.909089	12342	0.694152	Cammeo
12417	455.083	187.295	85.6114	0.889419	12851	0.658762	Cammeo
13029	466.887	197.726	84.6039	0.903834	13300	0.610058	Cammeo
13919	472.228	194.686	91.6258	0.882329	14169	0.701386	Cammeo
14675	493.273	206.794	91.5891	0.896571	15039	0.566165	Cammeo
13256	462.724	194.149	87.7289	0.892087	13465	0.647424	Cammeo
13862	482.214	199.18	89.9195	0.892297	14218	0.575904	Cammeo
15178	514.742	219.333	89.0112	0.91395	15638	0.787567	Cammeo
13964	481.23	201.559	89.3001	0.896499	14275	0.583292	Cammeo
13422	474.955	196.454	88.8506	0.891881	13817	0.55981	Cammeo
14855	495.899	208.571	92.4272	0.89645	15191	0.590609	Cammeo
12971	458.035	192.337	86.7547	0.892496	13248	0.777451	Cammeo
14950	496.884	207.823	93.1091	0.894023	15422	0.579323	Cammeo
14944	512.137	227.416	84.2471	0.928851	15147	0.812351	Cammeo
16283	516.736	217.71	96.0886	0.897329	16649	0.780061	Cammeo
12653	461.62	195.894	83.4993	0.904607	12973	0.576499	Cammeo
14007	490.66	205.396	88.0698	0.903409	14433	0.768939	Cammeo
15401	499.264	202.65	97.7685	0.875923	15760	0.617324	Cammeo
14625	497.252	212.799	88.3637	0.909709	14924	0.548945	Cammeo
14626	502.357	212.735	88.5834	0.90918	14997	0.581504	Cammeo
13998	484.882	198.721	90.9234	0.889188	14328	0.599512	Cammeo
17250	528.099	220.799	101.249	0.888664	17570	0.839661	Cammeo
14819	497.835	210.375	90.7098	0.902265	15119	0.590681	Cammeo
14794	501.569	213.491	89.1942	0.908544	15202	0.680622	Cammeo
13368	487.551	202.54	86.5729	0.904045	13965	0.718246	Cammeo
14586	484.053	196.403	95.8562	0.872811	14976	0.771542	Cammeo
12210	453.124	189.421	83.1554	0.898488	12641	0.637332	Cammeo
14732	497.694	207.468	91.2945	0.897978	15000	0.580366	Cammeo
13410	477.085	195.799	88.7767	0.891303	13842	0.572343	Cammeo
13658	499.374	206.51	85.7565	0.9097	14177	0.540269	Cammeo
13072	484.788	206.887	81.9267	0.918252	13593	0.704159	Cammeo
16059	522.724	217.85	95.1539	0.899565	16675	0.688459	Cammeo
13002	472.474	198.077	85.7992	0.901317	13432	0.694737	Cammeo
12752	462.36	190.734	86.6718	0.890792	13112	0.628425	Cammeo
13153	479.562	207.924	80.9425	0.921116	13339	0.684767	Cammeo
13857	498.029	220.267	80.3996	0.931003	14053	0.507955	Cammeo
13929	487.982	202.954	87.971	0.901177	14266	0.655328	Cammeo
16253	525.482	218.528	95.9118	0.898536	16690	0.567969	Cammeo
14850	511.991	223.147	85.4997	0.923685	15131	0.576699	Cammeo
14560	487.129	200.74	93.2266	0.885617	14867	0.673451	Cammeo
15164	501.652	212.158	92.4468	0.90007	15461	0.701063	Cammeo
14566	498.026	208.225	90.5405	0.900518	14927	0.560835	Cammeo
14627	498.073	205.788	92.4283	0.893459	15091	0.605522	Cammeo
16454	518.109	217.099	97.7807	0.892828	16893	0.79719	Cammeo
15458	511.952	216.608	91.7917	0.90577	15854	0.584048	Cammeo
14189	483.937	203.378	90.0777	0.896567	14538	0.713123	Cammeo
15545	516.869	217.119	92.2469	0.905255	16019	0.657488	Cammeo
14522	499.825	217.674	85.6879	0.91926	14719	0.531941	Cammeo
16566	527.586	217.095	98.1011	0.892078	16987	0.751906	Cammeo
13970	494.629	210.528	85.434	0.913958	14308	0.550542	Cammeo
14488	489.818	204.665	91.2249	0.895169	14826	0.638294	Cammeo
14483	512.721	215.768	86.2791	0.916572	14912	0.532287	Cammeo
13853	471.641	195.212	91.2915	0.883913	14213	0.65332	Cammeo
15700	525.809	224.039	90.3189	0.915139	16308	0.67617	Cammeo
13777	480.836	197.006	90.1847	0.889067	14266	0.63264	Cammeo
15069	505.455	211.906	91.9355	0.900985	15431	0.553519	Cammeo
15764	513.844	212.165	95.9599	0.891871	16258	0.604703	Cammeo
16258	518.77	214.286	97.379	0.890781	16551	0.707577	Cammeo
18313	538.498	222.464	106.185	0.878734	18724	0.62442	Cammeo
13605	466.937	191.522	91.732	0.877835	13919	0.612011	Cammeo
13930	484.862	205.272	87.2355	0.905205	14330	0.799426	Cammeo
15301	515.527	220.292	89.4664	0.913817	15690	0.53767	Cammeo
14277	492.031	213.3	85.5184	0.916108	14481	0.542522	Cammeo
15077	504.637	212.942	91.2127	0.903616	15404	0.786489	Cammeo
13102	479.273	202.508	83.7562	0.910461	13528	0.61799	Cammeo
15975	522.804	218.418	94.0441	0.902557	16290	0.567637	Cammeo
15258	505.163	214.019	91.6125	0.903752	15497	0.574127	Cammeo
14260	501.041	208.833	88.9632	0.904723	14737	0.613175	Cammeo
14706	503.307	212.684	89.0866	0.908047	15074	0.595964	Cammeo
13789	471.303	198.523	88.7129	0.894602	14025	0.631364	Cammeo
13342	488.27	208.666	83.1664	0.917141	13703	0.525938	Cammeo
13555	477.87	202.637	85.788	0.905963	13851	0.578063	Cammeo
14436	486.989	204.498	90.8644	0.895863	14709	0.641857	Cammeo
14421	489.818	204.957	90.3417	0.897613	14716	0.62526	Cammeo
13501	472.483	198.072	87.6896	0.896662	13787	0.634028	Cammeo
14287	486.402	200.143	91.9942	0.888104	14654	0.711327	Cammeo
14633	495.094	208.781	90.2559	0.90173	14978	0.643605	Cammeo
14682	505.031	219.886	86.0415	0.920263	15155	0.552911	Cammeo
12240	454.313	190.928	83.6493	0.898917	12555	0.757895	Cammeo
14985	516.961	219.533	88.0094	0.916125	15412	0.622973	Cammeo
14826	514.532	219.373	86.8858	0.918223	15170	0.543077	Cammeo
14954	501.857	212.038	90.7955	0.903682	15225	0.814621	Cammeo
14930	506.781	207.597	92.5515	0.895121	15361	0.612513	Cammeo
16401	521.077	213.103	99.5419	0.8842	16781	0.726608	Cammeo
13237	478.011	199.689	85.2776	0.904227	13627	0.558523	Cammeo
14536	501.921	216.371	86.68	0.916249	14988	0.544053	Cammeo
12016	469.425	196.949	79.8352	0.914158	12464	0.562968	Cammeo
15369	499.266	205.875	95.9362	0.884789	15666	0.616041	Cammeo
16156	495.714	197.274	105.538	0.844864	16434	0.709405	Cammeo
15554	502.096	206.278	97.2234	0.881961	15826	0.82734	Cammeo
12347	438.806	181.893	86.8777	0.87856	12529	0.806572	Cammeo
12688	466.838	193.787	84.3717	0.900245	12956	0.601898	Cammeo
14587	491.804	204.835	91.9132	0.893673	14926	0.609824	Cammeo
15398	518.745	215.329	93.0629	0.901783	15753	0.798155	Cammeo
14881	495.618	206.668	93.3242	0.892238	15225	0.583981	Cammeo
14800	502.619	213.995	88.8557	0.90972	15123	0.791232	Cammeo
15480	494.276	201.787	98.6182	0.872438	15760	0.662388	Cammeo
13952	484.947	201.323	89.5104	0.895724	14349	0.65641	Cammeo
14243	481.323	198.663	92.8225	0.884132	14592	0.7945	Cammeo
15056	499.171	202.894	96.1398	0.880609	15517	0.703551	Cammeo
15072	511.176	221.782	87.3817	0.919111	15392	0.550877	Cammeo
13560	479.199	197.558	88.7723	0.893357	14033	0.691766	Cammeo
17192	528.342	222.95	99.0927	0.895798	17457	0.628914	Cammeo
15196	498.145	212.244	91.6768	0.901902	15427	0.712758	Cammeo
16318	537.447	232.037	90.7105	0.92042	16592	0.598167	Cammeo
15521	506.048	209.518	95.4624	0.89017	15956	0.578451	Cammeo
12573	471.645	199.337	81.581	0.912417	12979	0.534566	Cammeo
13607	482.818	202.847	86.1541	0.905323	13901	0.556842	Cammeo
12809	455.144	189.079	87.208	0.887284	13025	0.590005	Cammeo
13183	464.572	190.691	88.7696	0.88504	13473	0.593909	Cammeo
14528	475.448	192.199	97.4174	0.862029	14795	0.62949	Cammeo
17048	525.538	219.489	99.7343	0.890801	17318	0.692333	Cammeo
14559	496.524	213.396	87.1354	0.912836	14765	0.710819	Cammeo
13698	478.599	199.06	88.7896	0.895011	13932	0.575595	Cammeo
14005	485.456	207.134	86.8755	0.907794	14212	0.563808	Cammeo
15560	502.966	213.963	93.1208	0.900325	15789	0.783682	Cammeo
13853	479.723	193.402	92.8598	0.877192	14338	0.58637	Cammeo
16138	531.059	224.347	92.9473	0.91014	16482	0.53966	Cammeo
14686	490.406	203.034	93.828	0.886812	15065	0.614683	Cammeo
15264	506.666	208.761	95.7372	0.888645	15712	0.607522	Cammeo
13895	488.253	207.034	86.161	0.909288	14228	0.782905	Cammeo
13290	469.712	197.269	86.3283	0.899162	13570	0.682694	Cammeo
13909	474.112	197.458	90.1741	0.889634	14227	0.742962	Cammeo
14730	483.706	196.451	96.8864	0.869926	15006	0.653099	Cammeo
14523	491.937	205.125	91.1421	0.895866	14849	0.610005	Cammeo
13983	481.659	198.39	90.4981	0.889897	14306	0.588015	Cammeo
12549	456.935	193.392	83.7014	0.901486	12905	0.797066	Cammeo
14289	502.814	216.608	85.5694	0.918663	14612	0.541004	Cammeo
14994	508.307	215.57	89.6199	0.909486	15246	0.550764	Cammeo
13283	477.289	198.271	86.3555	0.900168	13616	0.611134	Cammeo
14958	505.257	216.376	88.3489	0.912843	15235	0.708608	Cammeo
14852	495.817	205.714	92.9478	0.892104	15202	0.601296	Cammeo
14966	490.743	207.639	92.1642	0.896093	15158	0.788847	Cammeo
13394	480.572	205.401	83.8013	0.912987	13699	0.650194	Cammeo
16678	523.31	216.897	99.0449	0.889649	17089	0.803449	Cammeo
17253	536.694	223.627	98.9453	0.89679	17678	0.672999	Cammeo
13822	491.661	212.135	83.6546	0.918962	14073	0.654699	Cammeo
14747	501.766	213.742	88.5816	0.91008	15070	0.76441	Cammeo
15274	511.054	211.3	93.12	0.897654	15669	0.693264	Cammeo
14471	491.342	200.413	92.8194	0.886285	14736	0.585965	Cammeo
15119	508.342	213.379	91.2534	0.903941	15612	0.723778	Cammeo
13277	463.968	193.061	88.1757	0.889608	13454	0.610156	Cammeo
12988	461.991	188.773	88.5092	0.883269	13259	0.595152	Cammeo
11638	451.009	195.036	76.929	0.918924	11843	0.540598	Cammeo
13321	467.408	200.92	85.1378	0.905784	13543	0.598697	Cammeo
15368	503.307	209.419	94.3937	0.892654	15709	0.640333	Cammeo
13385	477.93	199.843	87.0465	0.900152	13656	0.565914	Cammeo
14784	481.986	200.027	94.9806	0.880073	15005	0.721593	Cammeo
16963	536.033	220.328	99.4098	0.892428	17467	0.592077	Cammeo
15140	502.553	213.896	90.8974	0.905212	15491	0.758213	Cammeo
14713	500.16	207.158	91.4611	0.89726	15111	0.571934	Cammeo
13684	505.655	213.594	83.5106	0.9204	14158	0.577628	Cammeo
13424	461.469	186.507	92.6718	0.867818	13702	0.675523	Cammeo
14020	488.582	207.265	86.7978	0.908089	14271	0.553909	Cammeo
14725	472.902	193.124	97.7161	0.862547	15084	0.634315	Cammeo
15603	511.744	211.104	95.44	0.891968	16021	0.580512	Cammeo
15433	519.522	218.388	91.6746	0.907627	15887	0.779444	Cammeo
15371	497.665	212.749	92.4656	0.900613	15587	0.812077	Cammeo
14018	480.868	203.978	88.1271	0.901854	14287	0.722428	Cammeo
12879	476.577	203.166	81.2608	0.916527	13105	0.660394	Cammeo
14992	502.617	213.941	89.9785	0.907257	15162	0.554643	Cammeo
15275	509.855	217.555	90.1838	0.910034	15582	0.667614	Cammeo
13762	481.77	205.041	86.9355	0.905666	14101	0.75549	Cammeo
15762	507.641	205.601	99.3208	0.875578	16261	0.663635	Cammeo
14143	483.865	200.878	90.5923	0.892533	14427	0.597659	Cammeo
15226	500.17	205.315	96.1777	0.883496	15594	0.793434	Cammeo
14226	491.389	213.787	85.3541	0.916843	14483	0.664394	Cammeo
14654	498.103	214.654	87.3805	0.913394	14907	0.803752	Cammeo
14928	499.393	212.404	90.7081	0.904226	15269	0.797436	Cammeo
15050	502.591	206.387	93.8085	0.890732	15464	0.591216	Cammeo
12158	441.478	182.287	85.521	0.883116	12359	0.715513	Cammeo
15783	510.194	219.552	92.2481	0.907447	16024	0.797927	Cammeo
14236	486.179	201.705	90.6424	0.89334	14545	0.656158	Cammeo
15373	489.131	200.141	98.9659	0.869188	15617	0.776414	Cammeo
15139	508.97	217.336	89.9579	0.910317	15394	0.549889	Cammeo
15228	505.265	209.625	93.5269	0.894952	15501	0.739223	Cammeo
14556	487.419	208.731	89.1951	0.9041	14819	0.776486	Cammeo
13279	483.658	201.338	85.4755	0.905411	13691	0.576346	Cammeo
16000	515.381	215.714	94.9548	0.897906	16289	0.673656	Cammeo
14712	503.711	217.61	87.2852	0.91603	15109	0.803144	Cammeo
13840	476.901	201.626	88.2425	0.899143	14205	0.630581	Cammeo
12975	458.547	189.818	87.655	0.886993	13254	0.709016	Cammeo
15862	507.548	214.873	94.8001	0.897413	16098	0.808337	Cammeo
17338	530.044	222.084	100.549	0.891637	17725	0.792449	Cammeo
16893	523.254	216.24	100.408	0.885659	17293	0.681059	Cammeo
15546	518.943	219.227	91.3864	0.908971	15967	0.553514	Cammeo
15269	519.766	222.42	88.2818	0.917855	15620	0.565749	Cammeo
15583	510.691	217.352	92.1209	0.90574	15826	0.68696	Cammeo
14840	512.008	220.514	86.415	0.920017	15160	0.564173	Cammeo
14805	484.632	202.98	93.6965	0.887086	15090	0.784205	Cammeo
13860	483.971	207.789	85.9611	0.910416	14047	0.648148	Cammeo
12468	461.55	196.818	81.5473	0.910128	12786	0.676506	Cammeo
13913	493.607	212.985	83.9913	0.918959	14218	0.572128	Cammeo
12978	465.85	199.129	83.9119	0.906878	13210	0.735131	Cammeo
13657	469.237	193.107	90.778	0.882618	13930	0.615346	Cammeo
14246	488.916	210.754	86.8852	0.911067	14453	0.748057	Cammeo
13651	502.08	222.074	79.3373	0.934006	14034	0.792649	Cammeo
13677	485.529	207.395	85.1431	0.911844	13874	0.585663	Cammeo
15107	488.866	205.215	94.3698	0.887993	15322	0.787233	Cammeo
14956	490.256	204.541	93.7513	0.888772	15196	0.672785	Cammeo
15448	521.318	224.891	88.7365	0.918863	15847	0.705388	Cammeo
14898	501.495	215.563	88.7706	0.911271	15156	0.658504	Cammeo
13683	490.793	210.282	84.045	0.916656	14187	0.773925	Cammeo
12412	456.58	191.572	83.4499	0.900137	12779	0.649503	Cammeo
13933	471.714	193.517	91.8762	0.880109	14177	0.744642	Cammeo
15500	502.321	213.367	93.5546	0.898747	15724	0.814974	Cammeo
14747	494.942	209.206	90.6475	0.901253	15124	0.556029	Cammeo
15144	503.324	212.195	91.7762	0.90163	15469	0.627861	Cammeo
13970	494.654	211.743	85.0703	0.915744	14280	0.696272	Cammeo
12375	451.081	185.781	86.2374	0.885737	12755	0.649743	Cammeo
15484	504.819	211.288	94.4718	0.894472	15795	0.679123	Cammeo
13541	478.461	206.699	84.0986	0.913489	13768	0.813469	Cammeo
13455	468.862	196.685	87.9845	0.894365	13730	0.654936	Cammeo
13043	471.357	199.29	84.5507	0.90554	13422	0.736435	Cammeo
13697	482.384	206.734	85.1809	0.91117	13927	0.597079	Cammeo
15004	506.944	218.604	88.0904	0.915214	15277	0.714885	Cammeo
14634	493.027	208.136	90.3794	0.900801	14898	0.71025	Cammeo
13814	481.416	203.062	87.3185	0.902825	14112	0.637471	Cammeo
16480	525.154	220.308	96.4774	0.899014	16842	0.576264	Cammeo
12403	451.244	194.006	82.4193	0.905274	12596	0.830688	Cammeo
13574	481.157	206.468	84.4245	0.912579	13870	0.809615	Cammeo
14253	485.023	202.33	90.5992	0.894144	14522	0.622619	Cammeo
15586	505.877	218.573	91.2437	0.908699	15814	0.823784	Cammeo
14906	497.825	211.342	90.653	0.903333	15150	0.597483	Cammeo
15123	518.258	226.381	85.8408	0.92532	15378	0.636919	Cammeo
12974	460.417	191.326	87.2857	0.88987	13310	0.677211	Cammeo
15513	522.504	224.276	89.0147	0.917863	15967	0.566168	Cammeo
12684	461.358	198.202	81.8943	0.910647	12912	0.547101	Cammeo
13170	472.102	200.195	84.8755	0.905679	13383	0.544935	Cammeo
15375	494.316	204.471	96.9816	0.88036	15631	0.739183	Cammeo
17856	530.416	223.292	102.901	0.887485	18062	0.795722	Cammeo
15655	513.301	216.099	93.5671	0.901402	16085	0.565653	Cammeo
17404	521.865	211.063	106.338	0.863809	17739	0.684658	Cammeo
12060	450.155	188.96	82.3295	0.900093	12480	0.622709	Cammeo
12519	455.406	192.002	83.8721	0.899544	12770	0.670685	Cammeo
15806	513.845	221.192	91.6295	0.910162	16043	0.574868	Cammeo
14124	486.591	202.961	89.8758	0.896609	14576	0.702722	Cammeo
16618	513.753	213.217	99.8923	0.883463	16892	0.636412	Cammeo
15321	513.007	218.712	90.2607	0.910871	15646	0.711876	Cammeo
12752	459.448	196.43	83.1093	0.906084	13059	0.790675	Cammeo
14479	473.957	193.132	96.9486	0.864878	14812	0.636635	Cammeo
12685	468.596	199.66	82.1984	0.911323	13042	0.695907	Cammeo
14339	492.308	205.773	90.8566	0.897243	14818	0.627472	Cammeo
14115	483.78	206.842	88.0686	0.904828	14312	0.747656	Cammeo
13864	491.446	206.884	86.3506	0.908729	14221	0.715968	Cammeo
14096	476.954	198.742	91.3667	0.888061	14346	0.59932	Cammeo
15779	506.377	209.405	97.4309	0.885166	16201	0.619465	Cammeo
15218	508.136	214.277	91.7103	0.903779	15685	0.668013	Cammeo
13814	477.586	198.903	89.6754	0.8926	14168	0.690976	Cammeo
13337	471.847	199.145	86.4656	0.900824	13686	0.664458	Cammeo
13024	459.771	191.905	88.0344	0.888571	13325	0.779693	Cammeo
14836	495.105	208.595	91.39	0.898916	15164	0.600551	Cammeo
14296	484.244	202.98	91.0714	0.893696	14572	0.757244	Cammeo
10785	437.884	181.266	77.6593	0.903576	11209	0.550143	Cammeo
14871	487.618	204.191	93.7998	0.888244	15067	0.763085	Cammeo
14449	496.326	209.706	89.7904	0.903697	14810	0.662312	Cammeo
14463	480.49	201.934	91.9439	0.89033	14698	0.675116	Cammeo
12887	468.833	197.763	83.7242	0.905964	13241	0.55677	Cammeo
13138	470.415	203.863	82.9842	0.913402	13361	0.810988	Cammeo
14833	496.936	209.312	91.4759	0.899447	15072	0.556753	Cammeo
12256	453.465	189.971	83.1053	0.899237	12565	0.583619	Cammeo
15475	511.427	219.148	91.4625	0.908744	15759	0.788736	Cammeo
15248	509.003	217.992	90.1075	0.910572	15557	0.73534	Cammeo
14750	482.825	198.503	95.4747	0.876736	15046	0.605501	Cammeo
12711	470.163	196.364	83.781	0.904411	13007	0.56045	Cammeo
13495	466.959	196.396	88.2131	0.893451	13725	0.689576	Cammeo
13884	478.702	201.316	89.1812	0.896526	14217	0.797931	Cammeo
15613	509.761	210.278	96.0243	0.889644	15975	0.572597	Cammeo
14645	485.113	201.154	93.5804	0.885196	14889	0.646407	Cammeo
12699	458.013	192.594	85.2039	0.896818	12965	0.590651	Cammeo
15322	506.398	217.864	90.1771	0.910316	15531	0.813615	Cammeo
13340	471.639	197.41	87.4258	0.896589	13712	0.765611	Cammeo
15404	499.231	206.087	95.633	0.885813	15740	0.624757	Cammeo
13789	494.38	216.916	82.1564	0.9255	14109	0.532744	Cammeo
12491	457.141	194.875	82.4911	0.905989	12721	0.770479	Cammeo
14880	502.881	217.999	87.5546	0.915802	15129	0.576699	Cammeo
13568	478.311	204.069	85.5091	0.907977	13819	0.568317	Cammeo
12819	472.69	202.344	81.2073	0.915932	13137	0.653964	Cammeo
17246	540.542	225.989	98.5732	0.899857	17704	0.573929	Cammeo
12068	450.146	187.3	83.1463	0.896066	12426	0.650075	Cammeo
14053	482.084	204.379	88.2391	0.901996	14316	0.71335	Cammeo
12711	459.618	192.975	84.9511	0.89789	13028	0.581952	Cammeo
11746	450.829	194.191	77.7439	0.916363	11953	0.555209	Cammeo
14291	481.24	196.501	93.8713	0.878515	14618	0.589198	Cammeo
15366	508.793	211.373	93.9678	0.895749	15746	0.564594	Cammeo
15557	509.022	211.934	94.7586	0.894477	16075	0.643117	Cammeo
13652	486.628	210.345	83.2991	0.918246	13950	0.579801	Cammeo
13574	488.497	210.686	83.7445	0.917609	13856	0.551677	Cammeo
13621	473.899	198.846	88.4287	0.895675	13989	0.608461	Cammeo
14025	475.957	197.392	91.7546	0.885398	14423	0.679901	Cammeo
14431	497.063	212.046	87.8514	0.910138	14805	0.648643	Cammeo
13469	475.087	203.248	84.868	0.90865	13739	0.727779	Cammeo
13632	485.937	205.215	85.8314	0.908332	13905	0.550121	Cammeo
11151	438.262	191.601	74.8474	0.920542	11325	0.66597	Cammeo
12878	459.604	192.172	85.9567	0.894389	13213	0.576248	Cammeo
11625	437.36	186.708	79.7238	0.904253	11830	0.72187	Cammeo
14312	488.419	208.17	88.4087	0.905337	14692	0.793348	Cammeo
13806	490.51	209.721	85.1312	0.913906	14284	0.795873	Cammeo
13928	479.724	204.43	87.0827	0.904734	14158	0.566271	Cammeo
13139	472.251	202.598	83.7918	0.910465	13379	0.783669	Cammeo
12234	449.38	188.626	83.9093	0.895607	12492	0.59475	Cammeo
13990	484.047	205.398	87.649	0.90438	14315	0.590794	Cammeo
15307	489.471	197.203	100.133	0.861494	15628	0.679104	Cammeo
11377	452.408	201.306	72.2814	0.933314	11555	0.525545	Cammeo
13207	469.7	196.488	87.339	0.895778	13546	0.574542	Cammeo
13404	476.206	203.312	84.622	0.909265	13751	0.634659	Cammeo
13334	470.524	194.319	89.2919	0.888172	13738	0.624309	Cammeo
11671	459.78	199.403	75.4585	0.925633	12110	0.643207	Cammeo
17135	525.938	217.728	101.155	0.885525	17471	0.593728	Cammeo
14816	496.316	206.657	92.1741	0.895021	15194	0.581499	Cammeo
15336	508.785	219.262	89.742	0.912404	15599	0.580008	Cammeo
14989	484.31	195.342	98.7005	0.862961	15393	0.761056	Cammeo
16302	526.34	225.323	92.9942	0.91086	16669	0.608352	Cammeo
15739	525.001	228.245	88.8493	0.921123	15978	0.573244	Cammeo
14851	512.319	218.008	88.4967	0.913903	15556	0.717752	Cammeo
12651	467.565	200.05	81.1727	0.913979	12991	0.594111	Cammeo
12709	456.174	191.373	85.7398	0.894022	12934	0.782815	Cammeo
13874	486.818	207.807	85.4903	0.911458	14116	0.5694	Cammeo
16291	523.193	223.252	93.6042	0.907859	16595	0.581157	Cammeo
14318	491.296	207.615	89.1266	0.903167	14629	0.562461	Cammeo
13975	482.589	203.416	88.6672	0.9	14275	0.672651	Cammeo
14806	497.856	211.133	90.0124	0.904568	15114	0.651214	Cammeo
14789	492.952	206.709	92.6036	0.894038	15069	0.747826	Cammeo
12990	469.48	200.515	83.4304	0.909328	13214	0.701215	Cammeo
12045	452.309	193.514	80.2776	0.909893	12368	0.552422	Cammeo
13946	482.14	203.257	88.2783	0.90076	14233	0.571511	Cammeo
14569	500.369	216.67	86.4575	0.916938	14801	0.8067	Cammeo
15306	524.685	227.782	87.0425	0.924108	15837	0.512506	Cammeo
13568	482.142	206.341	84.9763	0.911263	13798	0.772841	Cammeo
14289	488.485	208.574	88.3096	0.905944	14572	0.792073	Cammeo
14619	493.524	209.533	89.808	0.903489	14973	0.612314	Cammeo
13338	462.534	194.258	88.3823	0.890505	13639	0.743105	Cammeo
12935	462.98	195.304	85.4875	0.899114	13213	0.753042	Cammeo
13211	476.659	204.865	82.8851	0.9145	13608	0.71088	Cammeo
13785	489.916	213.376	82.7899	0.92166	14130	0.796637	Cammeo
12982	466.157	200.519	82.7962	0.910773	13188	0.62228	Cammeo
14999	498.541	213.508	90.1097	0.906575	15295	0.798711	Cammeo
15790	516.48	218.426	92.9359	0.904968	16197	0.750154	Cammeo
13719	487.147	208.865	84.3004	0.91493	14111	0.604414	Cammeo
13118	480.086	207.109	81.7057	0.918893	13652	0.568765	Cammeo
11975	458.902	199.043	78.0368	0.919939	12288	0.799826	Cammeo
11958	444.927	187.758	81.8833	0.899893	12240	0.726665	Cammeo
12621	444.588	184.943	87.6245	0.880637	12832	0.733992	Cammeo
11747	452.127	194.495	78.7445	0.914376	11935	0.542637	Cammeo
13372	472.17	197.78	87.6053	0.89655	13750	0.607349	Cammeo
15773	515.794	219.434	92.621	0.906553	16089	0.705411	Cammeo
15556	510.51	217.102	92.7732	0.904098	15781	0.607419	Cammeo
11421	441.161	189.522	77.2566	0.913143	11610	0.551792	Cammeo
13949	479.402	200.095	90.0947	0.892898	14286	0.581548	Cammeo
13266	466	198.061	86.0935	0.900585	13514	0.654336	Cammeo
14715	497.557	212.035	89.5056	0.906537	15094	0.79489	Cammeo
14439	492.323	205.416	91.4216	0.895502	14867	0.780824	Cammeo
14975	508.078	212.556	91.2748	0.903108	15482	0.631377	Cammeo
11411	430.934	184.309	79.2581	0.902816	11587	0.647874	Cammeo
11359	441.366	185.198	78.9822	0.904499	11755	0.580726	Cammeo
13090	472.945	202.602	83.2302	0.911722	13331	0.77529	Cammeo
11898	453.98	195.36	78.3691	0.916011	12134	0.548042	Cammeo
12919	474.601	207.93	79.4693	0.924083	13187	0.633781	Cammeo
13935	483.244	196.786	91.7178	0.884743	14428	0.593231	Cammeo
13909	488.708	206.352	86.9756	0.906832	14362	0.543342	Cammeo
13295	475.743	199.241	86.0838	0.901845	13639	0.615994	Cammeo
14009	487.063	208.652	86.5998	0.909801	14333	0.750107	Cammeo
15350	498.179	204.621	96.8934	0.88078	15751	0.663698	Cammeo
13263	474.498	197.843	86.6863	0.898898	13607	0.560093	Cammeo
13650	491.024	210.675	83.691	0.91771	14011	0.538589	Cammeo
12598	466.837	199.039	81.8665	0.911496	13072	0.575409	Cammeo
14551	502.112	208.192	90.848	0.899769	14962	0.558023	Cammeo
15700	505.303	209.988	96.1949	0.888903	16040	0.59007	Cammeo
14969	494.417	207.21	92.9105	0.893839	15286	0.639701	Cammeo
14424	497.77	210.743	88.5171	0.907513	14920	0.558204	Cammeo
11571	432.671	183.706	80.5602	0.898717	11741	0.662222	Cammeo
15204	510.487	216.317	90.854	0.907522	15535	0.562112	Cammeo
14019	482.454	197.198	92.67	0.882702	14411	0.576155	Cammeo
11874	433.844	176.611	87.0495	0.870093	12138	0.734414	Cammeo
13888	481.748	205.746	87.0028	0.906193	14178	0.585103	Cammeo
13087	468.811	198.287	84.8717	0.903767	13488	0.772459	Cammeo
14410	483.809	200.635	92.5212	0.887327	14788	0.583212	Cammeo
14542	490.146	208.43	89.2576	0.903666	14747	0.554129	Cammeo
15595	501.494	207.891	96.8852	0.884764	16030	0.768416	Cammeo
10761	429.018	183.567	75.2279	0.91217	11031	0.578797	Cammeo
15907	527.35	226.893	90.7905	0.916451	16288	0.573846	Cammeo
13848	492.91	207.015	86.9844	0.907438	14383	0.668792	Cammeo
14493	487.336	205.802	90.5388	0.898032	14835	0.755789	Cammeo
13468	470.763	194.473	89.7411	0.887163	14022	0.691837	Cammeo
12483	451.814	189.899	84.8618	0.894595	12686	0.595705	Cammeo
16799	524.247	218.343	99.1632	0.890918	17283	0.62371	Cammeo
12110	458.076	192.499	81.7943	0.905237	12562	0.708684	Cammeo
14934	488.271	201.08	95.9796	0.878729	15193	0.650379	Cammeo
13274	471.054	197.612	86.3455	0.899489	13615	0.623778	Cammeo
13891	486.938	209.805	85.7384	0.912688	14170	0.828473	Cammeo
12723	465.942	197.752	83.903	0.90553	12974	0.683151	Cammeo
14587	497.947	211.687	88.9132	0.907514	14926	0.648686	Cammeo
14202	485.938	202.614	90.6503	0.894332	14640	0.561766	Cammeo
15526	514.391	216.919	91.8296	0.905972	15936	0.580845	Cammeo
13839	481.588	201.343	88.8883	0.897272	14165	0.716935	Cammeo
13852	490.279	213.986	82.9665	0.921777	14158	0.728324	Cammeo
14935	489.234	202.407	94.6457	0.883939	15251	0.609045	Cammeo
13576	475.05	200.999	86.549	0.902546	13888	0.583287	Cammeo
13998	486.376	204.204	88.5129	0.901176	14401	0.546882	Cammeo
14469	484.467	204.249	90.7201	0.895946	14701	0.65873	Cammeo
14686	503.69	212.259	89.7837	0.906133	15003	0.552147	Cammeo
15269	496.689	210.452	92.7092	0.897741	15474	0.806688	Cammeo
12993	466.239	199.034	83.483	0.907782	13230	0.786644	Cammeo
13414	480.288	199.483	86.8429	0.900266	13933	0.555054	Cammeo
15035	506.152	216.935	89.3892	0.911159	15432	0.609297	Cammeo
13034	474.369	203.996	81.9809	0.915694	13316	0.615741	Cammeo
13315	476.203	205.189	83.061	0.914404	13510	0.551574	Cammeo
13620	479.877	203.397	86.3757	0.90535	13987	0.635765	Cammeo
14734	498.707	211.001	90.1115	0.90422	15171	0.7846	Cammeo
14652	499.336	212.504	88.7513	0.90861	15039	0.767925	Cammeo
14295	484.227	202.771	91.3971	0.892654	14528	0.551824	Cammeo
12655	459.905	192.995	84.9027	0.898036	12959	0.645334	Cammeo
13444	474.593	197.95	87.6392	0.896653	13881	0.656606	Cammeo
14115	490.408	207.96	87.4212	0.90735	14580	0.57058	Cammeo
15192	494.889	208.724	93.3807	0.89434	15410	0.626474	Cammeo
11128	441.433	184.411	79.2537	0.90294	11403	0.558102	Cammeo
15144	505.913	212.369	92.022	0.901244	15609	0.609515	Cammeo
14516	492.786	209.76	89.5132	0.904374	14836	0.733576	Cammeo
13470	471.188	200.502	86.7832	0.901476	13729	0.582109	Cammeo
14617	495.45	207.316	90.7075	0.899203	14950	0.637907	Cammeo
14359	506.089	223.261	82.4814	0.929255	14698	0.537871	Cammeo
14204	489.445	211.884	85.9451	0.91404	14487	0.686084	Cammeo
14440	498.119	210.274	88.9882	0.906035	14918	0.776302	Cammeo
13921	486.388	203.184	88.838	0.89935	14334	0.580187	Cammeo
14054	486.765	207.583	87.1307	0.907644	14343	0.789462	Cammeo
13039	476.698	198.897	85.5303	0.902818	13383	0.551799	Cammeo
13350	466.619	196.509	87.1616	0.89625	13562	0.79921	Cammeo
14850	498.443	213.761	88.9887	0.909228	15071	0.696496	Cammeo
11836	456.379	201.87	75.4586	0.92751	12084	0.753214	Cammeo
13333	472.384	200.939	85.1728	0.905721	13585	0.680255	Cammeo
13062	467.464	197.802	85.3986	0.902	13272	0.62408	Cammeo
12886	463.903	193.877	85.4777	0.897562	13196	0.595251	Cammeo
13437	476.113	202.82	85.1124	0.907689	13700	0.784139	Cammeo
11963	448.426	191.077	80.8142	0.906157	12205	0.755908	Cammeo
12213	459.167	195.587	80.6401	0.911049	12571	0.543404	Cammeo
13970	481.884	201.473	89.4972	0.89592	14310	0.567886	Cammeo
14511	510.285	216.346	87.1301	0.915317	14957	0.529985	Cammeo
14055	488.749	207.752	87.2503	0.907536	14484	0.550076	Cammeo
16188	526.876	224.042	93.1756	0.909417	16605	0.663008	Cammeo
13064	469.836	199.56	84.3646	0.906245	13382	0.656416	Cammeo
14161	488.687	206.507	87.9677	0.904733	14428	0.593952	Cammeo
13806	494.032	212.387	83.9307	0.918604	14247	0.533627	Cammeo
13623	493.568	211.73	82.9239	0.920115	14065	0.526554	Cammeo
15238	506.115	218.36	89.6197	0.911896	15529	0.547224	Cammeo
13688	481.314	204.309	86.378	0.906232	14024	0.789389	Cammeo
14520	496.021	208.426	90.7464	0.900242	14930	0.590965	Cammeo
13263	480.191	205.576	83.1374	0.914577	13517	0.680573	Cammeo
16602	528.353	224.415	95.4728	0.904992	16900	0.565482	Cammeo
14525	487.216	206.45	90.8439	0.897984	14798	0.593342	Cammeo
12344	466.842	204.109	77.8143	0.924476	12596	0.721281	Cammeo
14002	490.57	209.334	86.1463	0.911398	14336	0.656908	Cammeo
12267	454.025	190.674	83.0183	0.90024	12673	0.651668	Cammeo
15093	509.305	214.428	90.8833	0.905737	15497	0.572616	Cammeo
12789	454.389	183.625	89.7211	0.872501	13114	0.695054	Cammeo
12767	463.842	196.193	83.9736	0.903772	13104	0.60622	Cammeo
12079	445.995	190.674	81.1332	0.904954	12462	0.642671	Cammeo
14868	510.434	219.334	88.0391	0.915906	15190	0.796699	Cammeo
14531	492.958	207.625	90.5227	0.899951	14913	0.571254	Cammeo
13657	481.619	207.013	84.5187	0.912858	13872	0.56734	Cammeo
12692	465.172	193.207	85.2905	0.897288	13118	0.714801	Cammeo
12465	462.616	196.446	82.0913	0.908501	12794	0.730143	Cammeo
15032	500.609	209.917	91.9254	0.899017	15397	0.718925	Cammeo
13493	480.529	205.573	84.6838	0.911211	13843	0.796893	Cammeo
14729	496.939	209.52	90.8872	0.901016	15131	0.612076	Cammeo
14242	495.739	210.681	87.4285	0.90983	14549	0.640954	Cammeo
13215	479.61	207.888	81.6761	0.919588	13462	0.536672	Cammeo
15568	519.456	222.228	90.8175	0.912683	15984	0.782705	Cammeo
11332	449.26	194.782	75.3693	0.922104	11671	0.673682	Cammeo
13198	468.456	200.491	84.6917	0.9064	13455	0.731921	Cammeo
12442	459.535	187.509	87.1873	0.885323	12941	0.58758	Cammeo
14509	496.066	211.138	88.7233	0.907424	14836	0.558296	Cammeo
16051	516.174	214.877	96.8451	0.892676	16479	0.679638	Cammeo
14132	482.369	205.201	88.2964	0.902689	14341	0.586098	Cammeo
14806	498.632	214.39	88.9766	0.909811	15078	0.783386	Cammeo
13662	476.353	204.186	85.6148	0.907848	13894	0.674167	Cammeo
16500	523.346	219.724	97.1417	0.896962	16880	0.630638	Cammeo
11702	432.774	177.725	84.6633	0.879243	11975	0.597163	Cammeo
13050	467.522	194.899	86.9476	0.894975	13389	0.619776	Cammeo
15154	504.93	211.233	92.5081	0.899003	15598	0.575061	Cammeo
14340	477.896	196.475	94.2578	0.877408	14700	0.608142	Cammeo
13451	485.559	205.95	84.3161	0.912354	13862	0.599955	Cammeo
13959	477.263	200.494	89.4598	0.894935	14242	0.715736	Cammeo
13491	475.345	198.662	87.6508	0.897406	13812	0.698834	Cammeo
13621	478.753	200.043	88.0567	0.897906	14068	0.624587	Cammeo
16413	510.11	210.555	100.122	0.879708	16665	0.59989	Cammeo
13924	498.562	212.062	84.9108	0.916338	14444	0.547499	Cammeo
13289	467.315	194.884	87.8141	0.892728	13628	0.695395	Cammeo
14403	491.06	207.681	89.8434	0.901584	14708	0.596892	Cammeo
13764	479.479	199.296	89.9937	0.892241	14167	0.777144	Cammeo
14972	501.866	208.838	92.8932	0.895625	15476	0.727078	Cammeo
15135	506.435	208.723	93.8193	0.893284	15656	0.574514	Cammeo
13484	468.869	195.423	88.7839	0.890841	13786	0.724012	Cammeo
11815	456.603	200.111	75.7928	0.925497	12108	0.73376	Cammeo
14434	488.287	201.649	92.5337	0.888496	14826	0.707757	Cammeo
15389	521.304	226.961	87.3869	0.922904	15753	0.574645	Cammeo
14434	477.619	200.39	92.3816	0.887395	14660	0.783435	Cammeo
13933	483.932	207.206	86.2993	0.90914	14238	0.588387	Cammeo
14404	486.484	206.776	89.4743	0.901532	14658	0.794572	Cammeo
14038	496.612	211.565	86.0525	0.913543	14389	0.540172	Cammeo
14759	483.267	203.966	92.5515	0.891124	15002	0.785053	Cammeo
13429	491.377	208.909	83.8421	0.915932	13837	0.533066	Cammeo
14560	493.929	209.509	89.2179	0.904797	14971	0.631698	Cammeo
14623	499.313	208.228	91.4731	0.898344	15085	0.583566	Cammeo
14461	483.566	202.353	91.652	0.891545	14718	0.745412	Cammeo
15126	500.114	209.167	93.8142	0.893776	15496	0.706031	Cammeo
15594	515.661	216.534	93.28	0.902454	16029	0.666667	Cammeo
13887	483.168	203.421	88.1179	0.901307	14240	0.684392	Cammeo
15241	511.061	215.369	91.2743	0.905754	15604	0.543235	Cammeo
14101	479.316	199.087	90.9801	0.889474	14383	0.619688	Cammeo
15026	504.472	212.476	91.1335	0.903346	15285	0.722404	Cammeo
13467	478.247	204.719	85.1457	0.909403	13732	0.547773	Cammeo
13871	496.579	212.571	83.7742	0.919067	14344	0.527816	Cammeo
15830	516.232	220.819	92.344	0.90836	16074	0.701436	Cammeo
14621	501.825	210.916	89.6299	0.905215	15175	0.689085	Cammeo
13855	487.831	207.108	86.0237	0.909659	14214	0.551553	Cammeo
11783	453.105	192.684	79.1737	0.911681	12102	0.670441	Cammeo
11739	448.605	187.686	80.8497	0.902461	12118	0.547018	Cammeo
11538	446.857	189.685	78.9743	0.909207	11852	0.579945	Cammeo
13244	461.939	194.184	87.821	0.891888	13476	0.711278	Cammeo
13820	489.942	207.004	86.2371	0.909092	14195	0.6394	Cammeo
12950	464.887	194.428	85.822	0.897307	13288	0.600204	Cammeo
15600	502.843	205.276	99.0528	0.875876	16130	0.721421	Cammeo
13121	475.91	202.686	83.1302	0.912022	13439	0.57197	Cammeo
14586	489.544	206.599	91.2605	0.897149	14897	0.795571	Cammeo
13450	465.398	193.375	89.5069	0.886428	13661	0.615786	Cammeo
14251	492.032	202.848	91.0061	0.893711	14658	0.560379	Cammeo
15161	498.791	208.252	93.8603	0.892673	15541	0.64057	Cammeo
13476	478.283	199.023	87.9297	0.897111	13931	0.599173	Cammeo
14423	507.082	221.533	83.9089	0.925493	14703	0.542218	Cammeo
13580	464.357	190.381	91.3723	0.877298	13781	0.62731	Cammeo
12974	469.273	197.633	84.7321	0.903431	13219	0.686455	Cammeo
11995	477.411	216.488	70.7701	0.945059	12168	0.666056	Cammeo
14244	488.066	199.9	92.3154	0.88698	14691	0.61633	Cammeo
12844	454.837	191.98	85.4194	0.895561	13043	0.617886	Cammeo
13424	481.175	195.9	89.3052	0.890046	13950	0.658556	Cammeo
14035	480.629	199.148	91.4109	0.888432	14422	0.716291	Cammeo
14162	480.253	202.896	89.4875	0.897482	14414	0.584024	Cammeo
14143	481.908	199.991	91.0936	0.890241	14450	0.584228	Cammeo
14272	487.703	207.799	88.0672	0.905751	14510	0.583007	Cammeo
14205	487.351	204.332	89.6343	0.898649	14637	0.773693	Cammeo
13226	480.157	202.748	84.3442	0.909363	13617	0.707046	Cammeo
14399	492.339	210.14	88.1024	0.907868	14636	0.549182	Cammeo
14561	493.53	208.693	89.7053	0.902903	14986	0.772057	Cammeo
12968	469.341	199.905	83.0352	0.909651	13243	0.64125	Cammeo
12029	441.74	181.796	85.4196	0.882739	12275	0.596558	Cammeo
13450	470.976	200.608	85.9267	0.903622	13728	0.563752	Cammeo
15809	521.497	224.522	90.6051	0.914959	16150	0.564607	Cammeo
13205	475.6	197.549	86.3449	0.899422	13607	0.691108	Cammeo
14031	494.265	213.71	84.4661	0.918579	14265	0.738863	Cammeo
15811	514.378	218.731	93.1644	0.904756	16135	0.818671	Cammeo
14693	484.563	199.62	94.8076	0.880018	15034	0.609163	Cammeo
15209	517.688	221.252	89.1751	0.915179	15653	0.635297	Cammeo
13468	475.398	199.754	87.0447	0.900063	13817	0.570074	Cammeo
16505	516.221	212.853	99.6902	0.883542	16820	0.588414	Cammeo
12422	482.198	209.214	76.837	0.930116	12783	0.498075	Cammeo
14316	488.986	204.424	90.1491	0.897512	14731	0.564177	Cammeo
14839	504.084	211.37	91.3476	0.901792	15274	0.626382	Cammeo
13269	470.635	197.384	86.4286	0.899038	13626	0.566325	Cammeo
13913	474.452	199.117	89.717	0.892739	14164	0.673101	Cammeo
12411	466.028	204.513	78.296	0.923815	12707	0.530566	Cammeo
12602	465.917	194.455	84.832	0.899823	13039	0.650258	Cammeo
12820	467.353	197.337	83.9721	0.904947	13104	0.556834	Cammeo
15087	510.605	218.174	89.1525	0.9127	15506	0.549497	Cammeo
11161	433.83	182.075	78.9507	0.901098	11490	0.611227	Cammeo
16037	523.914	223.023	92.5474	0.909836	16404	0.801049	Cammeo
15809	517.233	222.421	91.5629	0.911335	16025	0.55689	Cammeo
11803	463.809	201.651	76.4243	0.925399	12138	0.549488	Cammeo
14620	493.944	212.266	88.7717	0.908351	14931	0.724193	Cammeo
15936	522.767	224.618	91.1237	0.914013	16298	0.609081	Cammeo
15557	514.537	214.075	93.8539	0.898772	15942	0.695565	Cammeo
15042	504.72	214.521	90.2087	0.907287	15375	0.695616	Cammeo
12861	455.866	191.823	86.2983	0.893086	13058	0.586724	Cammeo
13877	489.623	205.145	86.9364	0.905765	14176	0.563808	Cammeo
13503	477.244	201.172	87.3624	0.900784	13743	0.563188	Cammeo
14254	491.261	207.767	88.6137	0.904485	14607	0.569613	Cammeo
14061	470.749	190.29	95.0054	0.866449	14347	0.618012	Cammeo
15311	507.995	215.141	91.6198	0.90479	15690	0.704407	Cammeo
14227	490.504	206.491	88.6917	0.903058	14529	0.687129	Cammeo
13867	494.653	213.122	84.2059	0.918635	14200	0.533592	Cammeo
13639	482.415	200.736	87.7331	0.899434	14042	0.730296	Cammeo
14998	496.904	215.95	89.3961	0.910292	15279	0.824836	Cammeo
16005	518.893	221.216	93.133	0.907058	16343	0.551041	Cammeo
12536	475.146	205.766	78.2607	0.924847	12798	0.6949	Cammeo
14268	485.634	202.251	91.0527	0.892929	14586	0.616995	Cammeo
15290	501.057	209.368	94.1739	0.893129	15582	0.757831	Cammeo
15373	522.211	229.494	86.3416	0.926528	15757	0.671603	Cammeo
15609	492.663	202.23	99.012	0.871947	15884	0.681021	Cammeo
15256	495.771	209.621	93.423	0.895195	15449	0.574982	Cammeo
16625	535.989	229.794	93.0896	0.914272	16951	0.654141	Cammeo
14817	502.644	214.591	89.0541	0.909824	15275	0.797986	Cammeo
14198	485.903	205.104	89.3197	0.900196	14414	0.565838	Cammeo
14825	499.94	210.271	91.8239	0.899611	15274	0.774718	Cammeo
14470	489.786	207.363	89.8126	0.901337	14724	0.619621	Cammeo
12279	462.006	197.846	80.5421	0.913386	12619	0.636944	Cammeo
14828	494.256	209.663	90.798	0.901362	15038	0.570923	Cammeo
13858	475.369	201.442	87.9232	0.899719	14083	0.778539	Cammeo
17437	536.899	230.257	97.3115	0.906307	17650	0.759154	Cammeo
15265	505.099	211.443	93.1221	0.897796	15639	0.741307	Cammeo
14953	503.752	217.104	88.6149	0.912907	15229	0.723136	Cammeo
12243	449.624	191.079	82.6393	0.90164	12464	0.799726	Cammeo
16453	523.874	222.312	96.1785	0.901572	16803	0.754725	Cammeo
16386	515.097	208.953	100.743	0.8761	16813	0.607564	Cammeo
14204	482.17	201.074	91.0908	0.891499	14523	0.616012	Cammeo
13589	483.884	205.355	85.4103	0.909403	13883	0.545743	Cammeo
14439	492.553	211.852	87.4347	0.91086	14614	0.572794	Cammeo
13982	495.341	214.168	84.7773	0.918317	14298	0.781467	Cammeo
14410	477.662	197.176	93.6603	0.879982	14645	0.657271	Cammeo
12244	455.275	192.507	81.4286	0.906135	12480	0.575241	Cammeo
14070	484.216	203.28	89.0919	0.898843	14448	0.567339	Cammeo
14687	498.391	210.58	90.2959	0.903402	14977	0.566104	Cammeo
11735	453.518	194.105	78.0199	0.915663	11956	0.715331	Cammeo
12835	481.503	212.538	77.4526	0.931235	13055	0.511946	Cammeo
14853	488.561	201.563	95.4725	0.880708	15224	0.678529	Cammeo
15061	497.359	207.65	93.0558	0.893965	15327	0.716781	Cammeo
13385	460.825	192.646	89.7135	0.884948	13595	0.612754	Cammeo
12555	444.58	184.825	87.3672	0.881223	12773	0.652208	Cammeo
16067	526.425	228.942	90.1462	0.919217	16370	0.555855	Cammeo
15105	503.292	215.583	89.7967	0.909122	15327	0.600477	Cammeo
13434	455.823	184.17	93.3829	0.861919	13686	0.635839	Cammeo
14961	502.909	215.193	89.2314	0.909977	15218	0.675318	Cammeo
12429	469.608	202.415	78.8899	0.920923	12714	0.556855	Cammeo
13002	460.127	191.424	87.7746	0.888677	13325	0.679452	Cammeo
15147	510.016	213.156	91.6927	0.902749	15719	0.588736	Cammeo
15055	508.276	218.977	88.4911	0.914709	15361	0.686221	Cammeo
13540	458.53	189.111	92.3939	0.872525	13710	0.799953	Cammeo
11962	449.442	192.089	80.9647	0.90683	12171	0.538902	Cammeo
12692	443.143	182.933	88.9526	0.873815	12849	0.638238	Cammeo
11859	444.801	183.553	83.5742	0.890331	12213	0.763127	Cammeo
13627	476.989	201.195	86.9523	0.901787	13926	0.780559	Cammeo
13982	479.785	204.542	88.2796	0.902067	14221	0.772913	Cammeo
14870	506.561	214.931	89.4003	0.909388	15202	0.579727	Cammeo
14263	490.751	203.778	90.2659	0.896541	14779	0.731548	Cammeo
13954	481.288	204.777	87.5046	0.904102	14277	0.581126	Cammeo
13425	477.198	199.756	86.641	0.901041	13784	0.611673	Cammeo
14057	463.142	189.793	95.0889	0.865439	14259	0.626119	Cammeo
17198	520.992	209.97	105.671	0.864132	17586	0.606161	Cammeo
14675	493.929	199.234	95.6834	0.877128	15317	0.616856	Cammeo
12291	440.957	186.188	84.6807	0.890587	12476	0.730173	Cammeo
15072	487.585	202.495	95.3553	0.882185	15267	0.790559	Cammeo
16390	502.678	207.049	101.517	0.871551	16635	0.714504	Cammeo
13142	464.651	194.745	86.5873	0.89572	13406	0.661333	Cammeo
12759	463.641	200.957	81.2091	0.91471	12993	0.778938	Cammeo
16944	543.126	236.125	92.681	0.919749	17189	0.651943	Cammeo
15510	507.319	215.955	92.4744	0.903678	15862	0.599536	Cammeo
12859	445.01	184.305	89.4738	0.874256	13030	0.710442	Cammeo
14470	486.26	208.334	89.344	0.903376	14657	0.57654	Cammeo
17079	520.45	216.16	101.762	0.882254	17418	0.794372	Cammeo
13858	475.957	205.874	86.0446	0.908471	14042	0.651222	Cammeo
12324	449.152	190.392	83.2051	0.899452	12595	0.767134	Cammeo
17263	520.303	215.004	103.367	0.876848	17565	0.661874	Cammeo
16079	522.759	223.406	92.6432	0.909965	16392	0.641723	Cammeo
14806	481.912	198.244	95.7867	0.875523	15162	0.701042	Cammeo
14957	505.117	213.046	90.709	0.90483	15347	0.654115	Cammeo
15460	507.077	213.572	93.5561	0.898949	15819	0.58221	Cammeo
12716	444.108	186.896	87.2781	0.884264	12872	0.747384	Cammeo
16798	529.077	222.797	97.6834	0.898759	17173	0.638173	Cammeo
14015	475.724	195.322	92.4848	0.880794	14492	0.748625	Cammeo
14927	502.018	212.029	90.8161	0.903627	15392	0.594986	Cammeo
15158	513.726	218.82	89.3717	0.912792	15591	0.701759	Cammeo
14676	481.631	202.402	92.9472	0.888322	14936	0.650532	Cammeo
15094	513.924	224.72	86.4366	0.923066	15292	0.79417	Cammeo
18913	541.746	227.135	106.948	0.882209	19099	0.804124	Cammeo
14013	480.831	191.845	94.8757	0.869153	14622	0.625916	Cammeo
16176	522.991	221.927	93.9842	0.9059	16639	0.602346	Cammeo
15904	511.022	214.351	96.2121	0.893605	16248	0.717852	Cammeo
16580	530.095	226.445	94.4741	0.908812	16928	0.596188	Cammeo
15915	528.157	231.594	88.571	0.92398	16251	0.813027	Cammeo
15007	500.307	210.718	92.1705	0.899261	15431	0.580766	Cammeo
14892	486.335	203.069	94.125	0.886091	15111	0.792128	Cammeo
12239	473.514	208.048	75.6064	0.93163	12622	0.517199	Cammeo
17335	544.093	239.01	92.993	0.921206	17526	0.821097	Cammeo
16788	533.488	230.129	93.7629	0.913234	17041	0.572676	Cammeo
14968	514.801	220.224	87.7353	0.917216	15438	0.740917	Cammeo
17425	541.803	232.058	96.4417	0.90955	17758	0.703955	Cammeo
16570	519.123	221.014	96.2278	0.900241	16757	0.592336	Cammeo
13352	514.487	232.48	73.9868	0.948007	13585	0.592816	Cammeo
14824	513.217	220.16	86.8073	0.918986	15150	0.568361	Cammeo
15786	500.861	205.467	98.8167	0.876756	16127	0.610913	Cammeo
14571	489.433	206.788	90.4514	0.899262	14839	0.60551	Cammeo
14601	476.226	192.607	97.9321	0.861087	14815	0.627838	Cammeo
15581	517.332	221.959	90.3076	0.913488	15901	0.55409	Cammeo
12930	474.078	205.356	80.7121	0.919524	13181	0.740635	Cammeo
16505	506.896	207.346	103.244	0.867216	16782	0.778171	Cammeo
16006	528.176	222.672	93.0961	0.908407	16466	0.61185	Cammeo
14477	499.47	217.105	85.7922	0.918611	14726	0.575512	Cammeo
15071	494.135	200.595	97.3933	0.874224	15575	0.689212	Cammeo
14181	485.245	206.858	87.9433	0.905128	14423	0.64783	Cammeo
13680	473.086	194.94	91.2251	0.883748	14077	0.779487	Cammeo
15551	515.784	215.09	93.7508	0.90001	15908	0.565655	Cammeo
16865	517.747	210.479	103.805	0.869925	17234	0.650204	Cammeo
16258	533.341	229.113	91.1201	0.917512	16705	0.570817	Cammeo
15133	503.219	216.575	89.4761	0.910667	15359	0.592614	Cammeo
15742	499.982	209.394	96.4591	0.887578	15950	0.756609	Cammeo
12181	456.938	194.855	80.2849	0.911173	12489	0.584894	Cammeo
16679	528.552	222.78	96.6401	0.901013	17006	0.569171	Cammeo
16862	519.471	219.66	98.3916	0.89407	17104	0.612273	Cammeo
13013	470.956	197.695	84.8059	0.903317	13376	0.575644	Cammeo
15042	502.214	212.094	91.2927	0.902622	15416	0.70211	Cammeo
15486	492.694	204.372	97.678	0.878391	15688	0.601165	Cammeo
13109	484.993	204.728	82.8482	0.914461	13497	0.525116	Cammeo
14759	493.804	207.785	91.6857	0.897383	15106	0.705868	Cammeo
11396	446.283	192.232	76.5265	0.917345	11692	0.645154	Cammeo
14324	487.253	195.945	94.8414	0.875057	14822	0.757403	Cammeo
14850	500.298	213.078	89.3513	0.907831	15124	0.580214	Cammeo
13909	475.618	199.607	89.9442	0.892723	14241	0.727877	Cammeo
15454	500.897	208.542	95.3233	0.889418	15773	0.583434	Cammeo
14938	502.687	209.645	92.036	0.898483	15331	0.6352	Cammeo
11966	456.846	194.27	79.3507	0.912778	12337	0.574598	Cammeo
15644	501.114	210.358	95.277	0.891547	15858	0.787912	Cammeo
15552	492.982	198.206	101.644	0.858497	15936	0.627451	Cammeo
15807	513.511	219.296	92.2966	0.907118	16078	0.780978	Cammeo
13824	491.62	206.389	86.8549	0.907139	14268	0.633867	Cammeo
13282	470.258	199.711	85.1012	0.904666	13513	0.671622	Cammeo
14332	497.141	206.547	90.7594	0.898285	14830	0.566572	Cammeo
13779	481.976	200.479	88.8467	0.896436	14192	0.57198	Cammeo
13644	473.178	200.291	87.8437	0.898692	13859	0.676786	Cammeo
13809	489.022	213.826	82.494	0.922582	14070	0.805753	Cammeo
13726	484.247	209.703	83.8844	0.916508	13969	0.555596	Cammeo
14266	486.478	207.726	88.0999	0.905608	14485	0.603852	Cammeo
13200	477.851	202.597	83.6884	0.910696	13585	0.641399	Cammeo
16146	509.332	213.62	96.6488	0.891798	16404	0.596762	Cammeo
12820	459.171	193.705	84.8341	0.898997	13002	0.596168	Cammeo
12575	456.753	188.68	85.982	0.890132	12936	0.739271	Cammeo
14057	483.48	201.575	89.9064	0.895023	14388	0.567272	Cammeo
14305	490.182	206.885	88.6758	0.903483	14695	0.654182	Cammeo
12626	455.297	188.658	86.6014	0.888416	12911	0.733899	Cammeo
15655	488.903	199.557	101.026	0.862385	15880	0.633754	Cammeo
11797	451.96	195.594	77.4012	0.918369	11988	0.570151	Cammeo
15199	489.544	205.316	94.8087	0.887	15419	0.763999	Cammeo
12921	477.121	197.7	84.8276	0.90327	13557	0.723947	Cammeo
13724	468.572	191.872	92.4885	0.876153	14048	0.740717	Cammeo
13520	471.529	195.306	89.4406	0.888978	13950	0.570127	Cammeo
14261	496.359	208.852	88.2422	0.906358	14763	0.695659	Cammeo
13567	481.095	206.628	84.0092	0.913619	13818	0.601108	Cammeo
14850	499.207	210.134	91.1434	0.901038	15327	0.589005	Cammeo
15522	507.242	213.682	94.9015	0.895965	15782	0.778904	Cammeo
13241	466.99	193.544	88.0583	0.890503	13577	0.577655	Cammeo
16063	520.745	217.914	95.2005	0.899524	16561	0.556757	Cammeo
13494	479.446	203.027	85.7513	0.906427	13842	0.772941	Cammeo
15569	504.754	214.507	93.1972	0.900685	15815	0.773039	Cammeo
13621	477.543	200.958	87.2885	0.900738	13956	0.795898	Cammeo
13875	490.838	207.132	87.3253	0.906786	14243	0.575631	Cammeo
14265	480.927	200.188	91.4805	0.889481	14627	0.754562	Cammeo
12612	463.595	197.683	82.3769	0.909038	12919	0.584051	Cammeo
13268	473.434	200.701	84.7003	0.906585	13562	0.716221	Cammeo
14910	511.6	221.612	86.217	0.921219	15215	0.699639	Cammeo
14146	504.356	214.063	85.745	0.916271	14716	0.625265	Cammeo
13568	484.648	208.072	83.6962	0.915532	13962	0.787921	Cammeo
14212	484.946	205.003	89.6155	0.899393	14502	0.752196	Cammeo
14458	475.044	196.986	93.9999	0.8788	14669	0.60189	Cammeo
12734	470.614	204.403	80.1653	0.919883	12982	0.71459	Cammeo
14753	489.536	207.466	92.0066	0.896285	14984	0.80468	Cammeo
13901	478.849	200.442	89.342	0.89517	14232	0.568548	Cammeo
14819	496.623	205.991	92.8266	0.892709	15194	0.726422	Cammeo
12006	467.641	207.448	74.4688	0.933347	12237	0.548745	Cammeo
15344	501.8	212.423	92.9614	0.899158	15604	0.794203	Cammeo
12450	456.221	191.143	84.2134	0.897714	12740	0.572151	Cammeo
12817	460.552	191.188	86.3136	0.892292	13132	0.602331	Cammeo
14908	499.469	209.119	92.0629	0.89788	15324	0.763338	Cammeo
14980	503.817	214.187	89.8946	0.907662	15361	0.735395	Cammeo
15213	495.417	206.3	94.5326	0.888834	15516	0.701351	Cammeo
12899	472.263	205.521	80.4334	0.920236	13107	0.585919	Cammeo
13263	487.891	214.428	79.6411	0.928468	13491	0.674447	Cammeo
13988	491.489	208.365	86.785	0.909133	14427	0.613105	Cammeo
13181	470.389	199.472	84.9055	0.904887	13429	0.734358	Cammeo
12220	465.686	200.174	79.0418	0.918739	12588	0.574383	Cammeo
13834	480.274	202.77	87.7244	0.901572	14151	0.728105	Cammeo
16249	512.792	215.727	96.9657	0.893289	16493	0.737184	Cammeo
11993	444.565	187.183	82.6406	0.897263	12276	0.587374	Cammeo
14313	482.975	204.72	89.787	0.89869	14622	0.5733	Cammeo
14563	496.776	206.127	91.5304	0.896003	15116	0.591055	Cammeo
14176	513.149	220.037	83.4309	0.925328	14675	0.543788	Cammeo
14041	491.661	212.857	84.5673	0.91769	14289	0.786611	Cammeo
13022	467.077	194.754	86.6764	0.895503	13355	0.596245	Cammeo
12796	471.209	203.93	80.33	0.919149	13022	0.684059	Cammeo
13811	482.298	206.715	85.7366	0.909932	14000	0.555931	Cammeo
13053	480.951	205.952	81.6556	0.918044	13478	0.683582	Cammeo
12879	469.133	200.796	82.0431	0.912718	13132	0.769125	Cammeo
14768	499.877	210.559	90.4742	0.902978	15158	0.583116	Cammeo
12040	441.023	182.753	85.1511	0.884818	12372	0.747408	Cammeo
13023	480.448	205.312	82.0339	0.916708	13444	0.63243	Cammeo
14712	496.036	212.74	89.0926	0.908085	14925	0.733949	Cammeo
11353	431.479	182.002	80.063	0.898046	11579	0.716639	Cammeo
15534	521.93	221.586	90.5549	0.912683	16187	0.708345	Cammeo
13337	468.621	196.771	87.3104	0.896168	13598	0.694418	Cammeo
10951	432.612	182.044	78.2156	0.902995	11242	0.547112	Cammeo
12590	461.137	195.535	82.9622	0.905529	12915	0.676009	Cammeo
12932	456.655	191.329	86.7258	0.891367	13098	0.663043	Cammeo
11941	452.602	196.03	78.6872	0.915901	12131	0.651339	Cammeo
13665	472.516	199.544	87.6846	0.898279	13944	0.711422	Cammeo
14272	491.454	210.502	87.9379	0.908561	14545	0.803377	Cammeo
14874	487.504	204.913	92.8892	0.891353	15065	0.614476	Cammeo
14418	480.323	199.118	93.3112	0.883399	14780	0.758523	Cammeo
12434	454.893	193.158	82.8586	0.90332	12652	0.703679	Cammeo
13328	489.386	217.286	78.7089	0.932086	13530	0.757445	Cammeo
12104	441.775	182.462	85.5135	0.883376	12378	0.73913	Cammeo
14398	487.724	210.092	87.5972	0.908931	14654	0.785317	Cammeo
12352	453.135	191.112	83.3507	0.899881	12683	0.578467	Cammeo
14609	490.247	206.062	91.4997	0.896007	14837	0.719655	Cammeo
12663	468.224	199.697	81.6162	0.912669	12979	0.623394	Cammeo
13900	475.889	198.169	90.5426	0.88952	14161	0.717234	Cammeo
14439	490.47	204.828	91.0485	0.895773	14815	0.791395	Cammeo
14333	493.899	207.51	89.4462	0.90233	14772	0.559795	Cammeo
13848	475.59	196.226	90.747	0.886639	14260	0.586382	Cammeo
13582	475.856	195.64	89.249	0.889882	13890	0.721832	Cammeo
14212	485.986	203.418	90.0119	0.89677	14508	0.573203	Cammeo
15236	514.793	223.328	87.7615	0.919551	15686	0.656243	Cammeo
14955	508.717	217.982	88.6122	0.913645	15363	0.569411	Cammeo
14364	497.12	212.008	87.5348	0.910784	14805	0.64125	Cammeo
12975	463.851	196.424	85.0641	0.901363	13358	0.609126	Cammeo
12579	452.217	191.243	84.3692	0.897428	12889	0.600286	Cammeo
15982	523.174	220.015	94.2185	0.903667	16337	0.5692	Cammeo
10959	447.233	197.358	71.061	0.932929	11133	0.497413	Cammeo
13631	473.547	193.494	91.5091	0.8811	14141	0.580289	Cammeo
14482	489.318	205.386	90.8004	0.896968	14781	0.568903	Cammeo
14892	503.647	213.272	90.4787	0.905549	15279	0.593922	Cammeo
14608	504.306	210.27	90.1665	0.903393	15125	0.63513	Cammeo
12326	459.682	194.341	82.0795	0.906434	12686	0.619335	Cammeo
13467	473.301	203.082	84.9976	0.908199	13753	0.773966	Cammeo
15158	505.276	209.476	93.9268	0.893838	15586	0.609367	Cammeo
13132	471.804	199.557	84.9883	0.904777	13423	0.753673	Cammeo
14178	488.881	207.396	88.0681	0.905363	14406	0.55775	Cammeo
15232	508.817	216.763	90.6331	0.908391	15603	0.590823	Cammeo
10885	434.273	191.091	73.5486	0.922964	11024	0.799897	Cammeo
14802	497.832	209.618	91.1471	0.900515	15208	0.62298	Cammeo
14889	499.206	210.384	91.7118	0.899983	15221	0.604629	Cammeo
15547	501.805	208.499	95.8079	0.888172	15867	0.598284	Cammeo
11377	456.454	200.843	72.3512	0.93286	11573	0.752248	Cammeo
12709	461.012	190.779	87.4128	0.888855	13064	0.786935	Cammeo
12384	460.136	190.87	85.0912	0.89513	12811	0.604835	Cammeo
12219	438.281	182.188	86.1964	0.880999	12471	0.601773	Cammeo
13125	475.355	198.598	85.408	0.902803	13575	0.583178	Cammeo
13014	459.557	193.66	86.1982	0.89548	13253	0.67507	Cammeo
13523	468.167	195.402	88.654	0.891154	13811	0.667934	Cammeo
14851	517.347	217.698	88.8102	0.913004	15256	0.728062	Cammeo
14467	498.624	213.596	87	0.913289	14857	0.740758	Cammeo
14560	501.246	212.106	89.3213	0.907007	14988	0.689557	Cammeo
15007	506.58	217.267	88.5502	0.913177	15314	0.737372	Cammeo
14500	504.068	218.905	85.1412	0.921263	14864	0.619897	Cammeo
13637	466.653	193.534	90.3542	0.884329	13838	0.691672	Cammeo
16471	523.989	219.869	96.8112	0.897844	16844	0.733022	Cammeo
15452	513.262	220.039	90.5523	0.911397	15775	0.781193	Cammeo
14041	481.948	204.598	88.1879	0.902338	14284	0.572308	Cammeo
14865	495.071	202.868	94.2719	0.88547	15235	0.604195	Cammeo
12720	461.806	197.944	82.8113	0.908283	12974	0.756782	Cammeo
12972	467.38	194.529	86.5067	0.895681	13425	0.774679	Cammeo
12931	460.535	192.908	86.5667	0.893659	13302	0.607061	Cammeo
14017	474.31	198.337	90.8687	0.888873	14320	0.760553	Cammeo
13269	491.893	212.575	81.0641	0.924433	13728	0.650952	Cammeo
13734	487.84	213.247	83.1828	0.920783	13941	0.80523	Cammeo
14549	488.953	206.695	90.7607	0.898436	14856	0.582473	Cammeo
14831	493.761	208.269	91.5423	0.898223	15099	0.790228	Cammeo
13669	481.669	201.907	87.0683	0.902242	14065	0.558374	Cammeo
13735	484.771	204.811	86.7587	0.905847	13960	0.553697	Cammeo
15583	504.183	207.847	96.9118	0.884645	15906	0.685389	Cammeo
11856	456.422	201.003	75.4211	0.926935	12027	0.716461	Cammeo
12735	473.051	200.684	81.7312	0.913311	13140	0.537614	Cammeo
14378	491.48	202.712	91.3858	0.892617	14805	0.640217	Cammeo
14403	510.559	223.412	83.2021	0.928066	14781	0.598778	Cammeo
12274	456.124	194.487	81.239	0.908581	12562	0.709644	Cammeo
12172	452.329	193.693	80.8078	0.908816	12430	0.67803	Cammeo
14085	489.455	200.527	91.2356	0.890501	14670	0.627171	Cammeo
12410	463.49	195.171	82.3603	0.906601	12849	0.564091	Cammeo
13196	474.988	199.981	85.6582	0.903622	13463	0.556465	Cammeo
13455	467.198	195.929	88.5192	0.892123	13723	0.753528	Cammeo
12593	463.369	195.758	83.0797	0.905474	12907	0.69775	Cammeo
14608	498.352	210.691	89.9174	0.904359	14951	0.659801	Cammeo
12939	469.481	202.043	83.099	0.911503	13165	0.657703	Cammeo
13193	469.415	201.605	83.7297	0.909677	13535	0.735929	Cammeo
11883	448.216	191.746	79.464	0.910085	12103	0.550317	Cammeo
13501	485.756	205.771	84.9084	0.910896	13896	0.658521	Cammeo
12202	442.362	180.038	87.3992	0.874265	12521	0.779183	Cammeo
13273	463.333	197.453	85.9975	0.900172	13462	0.585823	Cammeo
12899	468.389	201.048	82.3874	0.91218	13132	0.7005	Cammeo
13885	479.288	198.094	90.5905	0.889307	14271	0.787132	Cammeo
13574	473.221	197.873	88.4419	0.894552	13879	0.641251	Cammeo
14913	502.868	215.6	88.8238	0.911191	15300	0.692726	Cammeo
16582	532.358	223.359	95.7497	0.903456	17089	0.71431	Cammeo
12467	467.206	199.806	80.1914	0.915927	12900	0.787058	Cammeo
13167	466.664	197.125	86.2164	0.899282	13448	0.580991	Cammeo
13062	469.424	200.629	83.2746	0.90979	13279	0.663214	Cammeo
14677	498.798	209.874	90.2725	0.902769	15060	0.647848	Cammeo
14106	485.58	199.921	91.5904	0.888884	14515	0.576226	Cammeo
14640	501.324	210.292	90.3317	0.903041	15119	0.586538	Cammeo
12256	470.108	207.98	75.7149	0.93138	12541	0.738313	Cammeo
14362	479.931	202.703	90.7067	0.894291	14606	0.591467	Cammeo
12091	463.351	203.594	76.6541	0.926415	12298	0.79306	Cammeo
12605	447.661	183.501	88.5162	0.875965	12859	0.595756	Cammeo
14697	495.883	208.158	90.9669	0.899458	15073	0.594924	Cammeo
14337	501.766	219.313	83.4464	0.924785	14631	0.743158	Cammeo
13760	474.188	198.392	89.0461	0.893612	13989	0.633751	Cammeo
16022	524.873	221.527	93.6353	0.906278	16545	0.542236	Cammeo
11510	433.514	180.382	82.622	0.888933	11827	0.767027	Cammeo
12798	469.298	202.165	81.5807	0.914964	13152	0.780366	Cammeo
13683	481.571	206.927	84.8991	0.911957	13922	0.762199	Cammeo
14379	495.151	212.021	87.8147	0.910195	14834	0.790794	Cammeo
13404	468.215	191.548	90.5383	0.881242	13804	0.706515	Cammeo
12858	466.163	198.547	83.7596	0.90666	13095	0.549276	Cammeo
15456	508.821	214.304	93.4565	0.899902	15884	0.780251	Cammeo
14149	474.952	195.355	93.3353	0.878484	14454	0.605694	Cammeo
13091	473.152	203.863	82.5507	0.914346	13451	0.752356	Cammeo
16403	521.909	215.151	98.4009	0.889283	16867	0.588765	Cammeo
13681	478.538	202.761	87.023	0.903214	14015	0.641939	Cammeo
14263	489.446	205.812	89.5091	0.900475	14637	0.663179	Cammeo
12068	457.739	196.442	79.5439	0.914351	12347	0.599503	Cammeo
15710	517.07	214.75	95.2474	0.896261	16259	0.607596	Cammeo
15545	510.284	213.437	93.555	0.898816	15909	0.568165	Cammeo
12720	449.624	178.615	92.7517	0.854602	13095	0.74386	Cammeo
15073	498.362	205.803	93.9963	0.889606	15476	0.613921	Cammeo
11771	441.86	186.998	81.2696	0.900623	12109	0.619266	Cammeo
14873	499.616	210.277	91.5836	0.900171	15195	0.57303	Cammeo
14092	499.417	210.963	86.7967	0.911441	14618	0.772927	Cammeo
14558	496.305	204.361	91.9566	0.893043	14908	0.569473	Cammeo
13321	473.993	199.273	85.9288	0.90225	13758	0.564569	Cammeo
10796	413.42	170.782	80.9969	0.880379	10980	0.623038	Cammeo
14444	491.144	203.507	91.6027	0.892968	14773	0.577945	Cammeo
13313	470.907	198.215	86.2721	0.900312	13560	0.57697	Cammeo
15578	509.599	216.909	92.6187	0.904255	15864	0.808827	Cammeo
13930	495.271	213.527	84.4337	0.918498	14564	0.549637	Cammeo
12092	449.189	192.579	80.4223	0.908628	12298	0.583929	Cammeo
13245	476.137	204.944	83.1582	0.91398	13536	0.799626	Cammeo
14572	497.551	211.08	88.7097	0.907402	14926	0.626591	Cammeo
12470	455.897	192.461	83.3955	0.901244	12704	0.581298	Cammeo
15777	515.684	218.698	93.2051	0.904638	16111	0.567192	Cammeo
14435	491.904	207.463	89.7056	0.901685	14842	0.577978	Cammeo
12745	470.304	205.093	79.509	0.921797	12940	0.533174	Cammeo
13533	473.932	196.118	88.9168	0.891315	13897	0.604557	Cammeo
12551	459.729	197.682	81.5703	0.910897	12741	0.818935	Cammeo
14078	478.47	203.645	88.5603	0.900491	14280	0.744395	Cammeo
13057	460.168	187.128	90.3128	0.875827	13385	0.750791	Cammeo
14824	499.075	212.486	89.8949	0.906101	15141	0.579198	Cammeo
14189	491.973	209.936	86.8091	0.910503	14496	0.550986	Cammeo
15418	504.759	209.924	94.437	0.893098	15779	0.582691	Cammeo
14828	493.5	209.904	90.6699	0.901893	15090	0.606512	Cammeo
11774	447.933	186.018	81.674	0.898455	12103	0.560027	Cammeo
13335	469.714	199.297	85.9124	0.902315	13657	0.61679	Cammeo
11350	445.821	195.952	74.5909	0.924716	11544	0.584299	Cammeo
13484	480.786	204.208	84.9013	0.909474	13827	0.658559	Cammeo
13189	482.367	203.717	84.4149	0.910107	13635	0.596356	Cammeo
12495	458.407	187.604	87.0257	0.885898	12993	0.674931	Cammeo
12712	470.562	202.197	81.3009	0.915601	13053	0.814872	Cammeo
13446	475.128	198.7	87.3793	0.898117	13765	0.575723	Cammeo
14294	514.477	226.407	81.5925	0.932806	14731	0.511011	Cammeo
12158	447.377	184.095	84.9131	0.887273	12467	0.631584	Cammeo
13918	489.04	207.882	86.4902	0.909339	14263	0.718756	Cammeo
13502	473.012	198.147	88.0356	0.895881	13778	0.753881	Cammeo
13314	474.087	203.948	83.6628	0.911988	13627	0.747138	Cammeo
14226	492.195	207.02	88.3633	0.904329	14465	0.57914	Cammeo
12916	471.196	201.003	82.6547	0.91154	13199	0.557036	Cammeo
13372	470.403	196.081	88.7111	0.891805	13745	0.583624	Cammeo
14314	484.731	206.866	88.5629	0.903723	14536	0.753368	Cammeo
13567	475.171	197.295	88.9129	0.892695	13940	0.637697	Cammeo
14602	500.233	218.488	85.6776	0.919906	14827	0.583636	Cammeo
11846	445.891	192.952	78.4718	0.913566	12010	0.577966	Cammeo
14482	486.163	201.815	92.5499	0.888649	14825	0.642559	Cammeo
12886	455.518	189.86	87.4992	0.887472	13080	0.592296	Cammeo
11718	449.344	189.141	80.1198	0.90585	12133	0.630542	Cammeo
13790	479.3	198.901	90.136	0.891424	14190	0.586908	Cammeo
14379	494.303	205.526	90.3972	0.89808	14768	0.578865	Cammeo
11931	445.101	187.921	82.1422	0.899407	12174	0.648142	Cammeo
12732	465.491	192.454	85.1826	0.896712	13105	0.56997	Cammeo
12044	449.167	188.363	82.4945	0.898997	12342	0.568381	Cammeo
14256	492.927	209.803	87.6904	0.908463	14730	0.702266	Cammeo
14283	482.698	202.366	90.6139	0.894147	14595	0.636497	Cammeo
11852	446.077	192.054	79.0992	0.911248	12029	0.716999	Cammeo
13204	473.816	203.775	83.1099	0.913048	13430	0.593065	Cammeo
13615	468.056	192.828	91.1548	0.881209	13855	0.583633	Cammeo
13309	460.922	191.463	88.9541	0.885519	13540	0.653748	Cammeo
12736	447.87	182.771	89.6817	0.871341	12964	0.752719	Cammeo
14184	479.234	197.464	92.0752	0.884633	14537	0.603831	Cammeo
14792	499.203	206.161	92.6803	0.893253	15326	0.694688	Cammeo
10937	424.586	177.167	79.757	0.892938	11103	0.595211	Cammeo
14011	493.879	212.63	85.0282	0.916564	14336	0.627986	Cammeo
13487	477.254	205.046	84.2823	0.911617	13772	0.737357	Cammeo
13115	461.036	195.019	86.7828	0.895532	13381	0.738457	Cammeo
14518	491.222	203.761	92.3429	0.891413	14877	0.741319	Cammeo
10610	410.506	171.156	79.346	0.886051	10769	0.825103	Cammeo
13173	467.476	194.676	87.364	0.89365	13443	0.573163	Cammeo
14232	492.546	205.027	89.5581	0.899553	14620	0.715176	Cammeo
12888	467.198	199.156	83.2889	0.908351	13222	0.725839	Cammeo
14300	504.377	212.598	87.4903	0.911397	14772	0.540438	Cammeo
13446	476.042	200.053	86.5905	0.901472	13814	0.603935	Cammeo
14250	486.124	201.219	91.9398	0.889511	14636	0.593676	Cammeo
13634	491.18	209.134	83.7337	0.916347	14075	0.78791	Cammeo
15752	519.889	216.702	94.2191	0.900534	16426	0.601221	Cammeo
14892	503.339	209.621	91.803	0.899001	15338	0.65566	Cammeo
13636	482.053	202.405	86.8838	0.903182	13982	0.584008	Cammeo
13548	479.749	203.272	85.6025	0.907004	13850	0.554428	Cammeo
13655	477.626	203.956	86.2228	0.906245	13857	0.737829	Cammeo
14974	498.625	210.924	90.904	0.902362	15212	0.640901	Cammeo
14695	506.916	214.106	88.9137	0.909694	15086	0.546608	Cammeo
15080	512.946	211.926	92.1408	0.900538	15533	0.566768	Cammeo
15977	516.209	216.758	94.9293	0.898999	16401	0.627509	Cammeo
13380	469.177	190.813	91.0132	0.878917	13747	0.619617	Cammeo
12006	463.381	198.968	77.8185	0.920344	12344	0.535027	Cammeo
14275	485.788	206.462	88.9257	0.902489	14469	0.547564	Cammeo
15469	514.907	221.018	89.767	0.913806	15860	0.541783	Cammeo
13436	467.959	195.023	89.149	0.889404	13798	0.796066	Cammeo
13147	468.92	199.228	84.4808	0.905643	13431	0.68474	Cammeo
13912	480.843	206.907	86.2638	0.908943	14107	0.806259	Cammeo
15153	514.404	218.092	90.0523	0.910772	15628	0.68085	Cammeo
11965	455.818	196.162	78.4288	0.916595	12247	0.659447	Cammeo
10727	425.902	178.714	77.5314	0.900995	10960	0.564341	Cammeo
13636	481.256	203.929	86.1801	0.906317	13888	0.549706	Cammeo
13650	475.242	199.326	87.9747	0.89733	13859	0.572135	Cammeo
14284	499.915	213.166	86.9262	0.913077	14678	0.704582	Cammeo
13654	477.93	199.377	87.6778	0.898116	13914	0.575754	Cammeo
14828	494.288	202.103	95.0346	0.882545	15197	0.591794	Cammeo
13787	474.338	194.695	91.0773	0.883837	14075	0.616179	Cammeo
12744	467.925	200.612	81.7065	0.913301	13047	0.71451	Cammeo
15149	509.137	214.007	91.2837	0.904467	15516	0.707104	Cammeo
13728	488.102	208.974	84.6409	0.914303	14052	0.557935	Cammeo
12386	467.85	201.901	79.3088	0.91962	12679	0.791842	Cammeo
14753	494.852	212.103	89.3653	0.906908	15051	0.816888	Cammeo
12924	474.424	203.02	81.8222	0.915189	13150	0.535732	Cammeo
14761	499.511	210.799	90.5555	0.903027	15197	0.658327	Cammeo
13513	473.103	196.279	89.516	0.889946	13867	0.74939	Cammeo
15868	519.529	219.179	93.2696	0.904939	16281	0.571264	Cammeo
14755	510.138	218.699	86.8124	0.917841	15025	0.533326	Cammeo
11141	431.925	181.24	79.1158	0.899692	11372	0.790646	Cammeo
14814	503.148	217.257	88.1783	0.91393	15110	0.545113	Cammeo
12153	451.211	187.769	83.6488	0.895288	12497	0.706488	Cammeo
14026	494.603	212.815	84.9223	0.916932	14267	0.546397	Cammeo
14269	501.04	214.669	85.6432	0.916971	14733	0.70001	Cammeo
11999	465.658	194.784	80.4382	0.910749	12364	0.537012	Cammeo
13932	495.528	213.349	84.3209	0.918584	14297	0.554839	Cammeo
11733	436.26	182.889	82.6261	0.892128	11955	0.686622	Cammeo
14321	490.425	204.28	90.683	0.896069	14622	0.573873	Cammeo
13637	482.511	205.199	85.4242	0.909228	13952	0.556612	Cammeo
13803	492.021	207.05	87.1841	0.907025	14174	0.569149	Cammeo
13533	469.532	192.396	91.2304	0.880428	13954	0.621607	Cammeo
12892	482.63	204.598	82.352	0.915417	13376	0.651243	Cammeo
14960	496.928	209.662	91.6853	0.899315	15198	0.760163	Cammeo
16603	513.523	213.52	99.9615	0.883644	16922	0.608905	Cammeo
15676	509.224	212.908	94.7617	0.895489	16009	0.574633	Cammeo
14136	488.968	203.391	89.787	0.897285	14475	0.592059	Cammeo
12758	456.638	190.368	86.1626	0.891708	13177	0.703346	Cammeo
16608	516.092	207.671	103.351	0.867369	17111	0.696761	Cammeo
12318	448.686	187.701	84.1441	0.893889	12579	0.582687	Cammeo
11068	419.93	174.13	81.8095	0.882763	11242	0.603918	Cammeo
14235	505.845	214.157	87.4798	0.912765	14687	0.68257	Cammeo
13117	460.574	192.404	87.629	0.890265	13575	0.78451	Cammeo
13562	474.219	194.613	90.669	0.88484	13871	0.713339	Cammeo
14897	509.631	219.672	87.5006	0.917245	15330	0.713663	Cammeo
13662	466.748	191.405	91.9152	0.877152	13875	0.587461	Cammeo
11694	432.977	181.484	82.9715	0.889373	11893	0.763914	Cammeo
15151	496.193	207.931	93.963	0.892072	15547	0.761395	Cammeo
12597	451.543	189.605	85.231	0.893271	12858	0.681545	Cammeo
13923	488.708	209.737	85.7161	0.912677	14165	0.534226	Cammeo
15323	487.866	192.231	102.963	0.844459	15769	0.713693	Cammeo
14390	497.919	216.376	85.1957	0.919222	14586	0.537904	Cammeo
14952	488.63	203.003	94.5545	0.884901	15187	0.615613	Cammeo
14419	491.671	203.912	91.0368	0.894808	14906	0.627814	Cammeo
12556	474.024	207.954	77.7101	0.927554	12832	0.564822	Cammeo
14658	486.179	201.887	93.2078	0.887044	14892	0.648297	Cammeo
12907	466.24	194.469	85.9109	0.897128	13268	0.635406	Cammeo
14838	500.162	211.983	90.9466	0.903291	15165	0.786411	Cammeo
15681	507.697	207.025	97.7585	0.881488	16088	0.692501	Cammeo
14734	507.284	217.824	86.6588	0.917456	15039	0.681373	Cammeo
15607	505.903	208.011	96.889	0.884896	16030	0.724997	Cammeo
15292	510.483	219.659	89.1331	0.913971	15511	0.543194	Cammeo
11577	431.156	178.836	83.4062	0.884583	11810	0.756074	Cammeo
13174	480.577	203.506	83.4204	0.912124	13606	0.549466	Cammeo
14305	491.161	207.871	88.6097	0.904595	14633	0.579525	Cammeo
14547	491.044	206.657	90.1751	0.899776	14780	0.593222	Cammeo
11794	430.38	178.446	84.7859	0.879913	12056	0.752937	Cammeo
12004	449.035	186.649	83.4133	0.894584	12417	0.758115	Cammeo
15285	495.839	206.333	94.791	0.888225	15517	0.668869	Cammeo
14385	496.978	214.27	86.0332	0.915851	14604	0.776267	Cammeo
14034	491.732	205.505	88.3521	0.902864	14448	0.555912	Cammeo
13399	490.56	209.366	82.767	0.918543	13654	0.517096	Cammeo
14960	510.729	218.37	88.0595	0.915086	15235	0.578276	Cammeo
13811	485.69	209.273	85.2003	0.913372	14083	0.690619	Cammeo
17564	527.116	221.603	101.659	0.888569	17808	0.771163	Cammeo
14680	495.444	206.754	91.2965	0.897226	15091	0.61159	Cammeo
14180	485.171	204.107	89.3608	0.899066	14471	0.619809	Cammeo
13387	464.643	192.4	90.3141	0.882981	13746	0.753518	Cammeo
15611	506.547	215.201	93.3923	0.900924	15806	0.732189	Cammeo
12426	451.089	185.191	87.4607	0.881452	12779	0.624579	Cammeo
14196	499.23	210.18	87.1035	0.910084	14509	0.618859	Cammeo
12609	475.36	202.754	81.2737	0.916145	13210	0.706941	Cammeo
14750	484.152	201.247	94.8592	0.881943	14967	0.780671	Cammeo
15290	500.188	204.153	96.6903	0.880731	15605	0.788958	Cammeo
15879	517.927	216.65	94.6562	0.899506	16484	0.68776	Cammeo
14330	493.185	209.767	87.8989	0.907972	14701	0.619595	Cammeo
14155	480.522	200.547	91.0597	0.890973	14462	0.722194	Cammeo
13939	484.393	207.026	86.2235	0.909142	14233	0.642469	Cammeo
12488	469.828	200.744	80.0469	0.917059	12932	0.744663	Cammeo
13447	455.648	183.958	94.4581	0.858103	13867	0.625908	Osmancik
13233	459.859	192.591	88.3467	0.888577	13436	0.588735	Osmancik
12538	452.66	188.805	86.1097	0.88994	12846	0.684165	Osmancik
11881	439.185	183.89	83.3495	0.891379	12097	0.58283	Osmancik
11750	428.375	178.554	84.7042	0.880314	11869	0.608682	Osmancik
13700	455.625	185.959	94.5655	0.861044	13893	0.614515	Osmancik
12121	439.842	183.467	84.7644	0.886872	12389	0.648737	Osmancik
12148	434.307	177.478	88.5175	0.866744	12437	0.75505	Osmancik
12675	456.573	186.807	88.4238	0.880878	13098	0.613861	Osmancik
12432	453.04	190.544	84.2505	0.896937	12728	0.765753	Osmancik
10982	421.41	177.8	78.9374	0.896043	11167	0.594071	Osmancik
11672	430.642	177.948	84.6798	0.879517	11849	0.597461	Osmancik
12546	442.066	184.265	87.3049	0.880632	12744	0.678896	Osmancik
12357	452.983	189.578	84.285	0.895733	12666	0.646625	Osmancik
11455	405.619	159.57	92.33	0.8156	11639	0.776189	Osmancik
13054	478.453	203.22	83.0808	0.912614	13329	0.799877	Osmancik
12233	425.181	170.946	92.0129	0.842781	12388	0.64276	Osmancik
13518	451.163	185.558	93.2959	0.86441	13741	0.781839	Osmancik
11605	429.225	175.014	85.5044	0.872532	11933	0.609762	Osmancik
13010	463.419	194.768	86.1158	0.896943	13349	0.776948	Osmancik
12293	442.052	180.372	88.5213	0.871289	12607	0.602067	Osmancik
11903	433.713	180.906	84.3603	0.884616	12104	0.686448	Osmancik
11136	427.11	175.653	81.9188	0.884591	11474	0.574376	Osmancik
10681	421.256	178.369	77.9608	0.899425	10929	0.557173	Osmancik
13333	467.025	196.797	87.2731	0.89629	13589	0.694427	Osmancik
11438	433.918	178.352	83.5477	0.883493	11767	0.743017	Osmancik
11480	419.107	170.622	86.6279	0.861524	11674	0.785441	Osmancik
12725	441.68	170.233	97.739	0.818751	13081	0.641219	Osmancik
11715	439.703	183.223	82.4832	0.892938	11948	0.604489	Osmancik
12659	453.768	188.04	86.7075	0.887342	12887	0.66434	Osmancik
11201	423.281	175.04	83.4368	0.879081	11386	0.592646	Osmancik
11382	418.336	169.883	86.6601	0.860105	11575	0.620002	Osmancik
12388	440.449	175.242	92.2321	0.850292	12753	0.61348	Osmancik
13078	452.991	183.979	91.69	0.866963	13385	0.732743	Osmancik
10774	401.742	164.32	83.7189	0.860479	10944	0.661794	Osmancik
12408	454.391	191.897	83.0335	0.901538	12664	0.583906	Osmancik
12345	440.196	180.389	88.1569	0.87245	12591	0.733686	Osmancik
10286	401.789	159.075	83.5986	0.850775	10524	0.770141	Osmancik
12340	466.743	196.694	80.8404	0.911637	12774	0.744495	Osmancik
14723	490.709	205.417	92.4997	0.892876	15013	0.570195	Osmancik
11042	411.623	168.36	84.19	0.865991	11217	0.791882	Osmancik
13335	474.377	197.84	87.5825	0.896673	13702	0.667017	Osmancik
12274	441.853	179.854	87.7601	0.87287	12587	0.615979	Osmancik
11358	430.792	177.456	82.1194	0.886485	11546	0.750396	Osmancik
12289	444.555	186.353	84.8593	0.890303	12448	0.767679	Osmancik
12900	461.836	195.345	84.572	0.901425	13160	0.591797	Osmancik
12288	437.822	179.188	88.1045	0.870772	12498	0.802718	Osmancik
12466	439.183	177.419	90.0172	0.861728	12707	0.609883	Osmancik
11380	423.615	172.174	85.6573	0.867461	11620	0.673174	Osmancik
12016	443.223	189.281	81.1222	0.903503	12186	0.746567	Osmancik
9431	383.959	159.656	75.7957	0.880124	9556	0.775576	Osmancik
11413	421.953	171.325	85.9993	0.864888	11688	0.699326	Osmancik
11108	416.834	166.337	86.4592	0.854297	11420	0.680012	Osmancik
12994	453.941	192.166	86.5555	0.892816	13152	0.81416	Osmancik
10862	412.426	167.387	83.5316	0.866583	11050	0.672153	Osmancik
11883	429.131	171.334	89.8245	0.851555	12179	0.76364	Osmancik
12673	441.714	177.03	92.5875	0.85233	12950	0.621774	Osmancik
12921	449.487	181.035	92.0201	0.86118	13209	0.623871	Osmancik
10685	416.717	173.275	79.7061	0.88792	10871	0.70668	Osmancik
10267	424.949	182.409	72.5379	0.91753	10455	0.547427	Osmancik
12042	441.81	182.177	85.0436	0.884353	12302	0.640805	Osmancik
11465	410.515	160.706	92.1443	0.819296	11706	0.757566	Osmancik
11592	428.427	177.622	83.7383	0.881897	11764	0.752727	Osmancik
12110	448.84	191.804	80.6546	0.90729	12313	0.617857	Osmancik
11077	417.322	175.958	80.5766	0.888987	11246	0.671333	Osmancik
11539	434.341	178.928	83.0378	0.885791	11788	0.70861	Osmancik
12526	439.222	178.216	90.4044	0.861785	12819	0.668945	Osmancik
9967	400.219	167.239	76.9632	0.887816	10128	0.664644	Osmancik
11395	421.963	169.747	86.9718	0.858769	11586	0.6237	Osmancik
11022	417.259	168.611	84.6779	0.864747	11259	0.607273	Osmancik
12495	451.317	182.642	88.6812	0.87421	12902	0.590613	Osmancik
11545	431.116	174.737	85.6614	0.871592	11911	0.652998	Osmancik
13021	455.977	185.104	91.0628	0.870621	13380	0.700656	Osmancik
11267	421.869	170.356	86.011	0.863184	11576	0.740763	Osmancik
11329	414.617	168.913	86.1218	0.860259	11540	0.784122	Osmancik
12743	435.818	176.111	92.4771	0.851036	12897	0.632093	Osmancik
11739	434.629	179.148	84.4587	0.881894	12032	0.775876	Osmancik
11489	432.207	182.362	81.0702	0.895751	11683	0.799068	Osmancik
12059	431.646	171.672	90.9151	0.848256	12359	0.699559	Osmancik
11316	418.549	170.686	85.6909	0.864845	11497	0.608387	Osmancik
9776	403.676	170.88	73.1113	0.903849	9969	0.641933	Osmancik
11319	414.014	164.781	88.5093	0.843497	11563	0.746685	Osmancik
10561	405.739	168.939	80.0908	0.88048	10709	0.602247	Osmancik
10640	411.88	169.39	81.0285	0.878168	10901	0.66087	Osmancik
10030	414.384	181.601	70.7599	0.920965	10152	0.771895	Osmancik
9746	382.737	154.096	81.2033	0.849887	9935	0.667534	Osmancik
11990	416.753	166.582	91.9835	0.833724	12145	0.6617	Osmancik
11941	434.804	174.23	89.4745	0.858064	12249	0.754137	Osmancik
13002	458.316	187.397	89.5874	0.878327	13319	0.676342	Osmancik
10387	400.581	164.761	81.0157	0.870755	10536	0.806632	Osmancik
11462	432.108	180.28	81.8902	0.89088	11725	0.699927	Osmancik
11955	454.086	196.836	78.1248	0.91786	12127	0.558123	Osmancik
12571	453.337	188.703	86.5486	0.888617	12847	0.791824	Osmancik
9760	399.575	167.365	75.5449	0.892333	10012	0.613836	Osmancik
12912	459.739	188.73	88.9623	0.881934	13205	0.690481	Osmancik
12358	447.174	183.465	87.7421	0.878223	12586	0.584579	Osmancik
12556	437.914	180.211	89.3849	0.868322	12735	0.718594	Osmancik
10335	416.85	178.799	74.7086	0.908523	10504	0.711532	Osmancik
12387	444.225	178.098	90.5818	0.860999	12753	0.64328	Osmancik
11674	425.072	175.757	85.5062	0.87368	11865	0.644047	Osmancik
12243	449.681	182.026	87.1317	0.877991	12744	0.778569	Osmancik
11928	427.075	175.039	87.8171	0.865042	12121	0.627789	Osmancik
12994	457.19	187.335	89.4096	0.878756	13335	0.763589	Osmancik
11310	424.218	173.269	84.4846	0.873072	11629	0.711187	Osmancik
10151	420.9	181.996	72.0995	0.918181	10407	0.521634	Osmancik
11818	433.828	175.964	86.7738	0.869953	12118	0.714943	Osmancik
11622	425.893	173.195	86.7165	0.865629	11941	0.603521	Osmancik
10650	407.161	165.62	83.1475	0.864846	10851	0.6155	Osmancik
10736	416.8	176.135	78.6436	0.894786	10930	0.798097	Osmancik
11893	435.283	176.659	87.1089	0.869978	12243	0.772323	Osmancik
11866	436.129	176.121	87.7881	0.866916	12210	0.616224	Osmancik
11168	440.863	182.783	79.5269	0.900388	11628	0.547102	Osmancik
12405	437.086	178.094	89.9608	0.863042	12615	0.810149	Osmancik
11327	415.815	171.681	84.5009	0.870484	11497	0.802764	Osmancik
11533	424.566	174.215	85.424	0.871533	11773	0.736462	Osmancik
11658	424.534	170.77	88.2464	0.856133	11963	0.682993	Osmancik
13259	464.408	198.212	85.8157	0.901418	13445	0.582046	Osmancik
12031	446.99	178.59	88.8415	0.867486	12425	0.580451	Osmancik
10924	414.312	170.807	82.644	0.875154	11171	0.672826	Osmancik
13388	466.462	191.938	90.3668	0.882233	13644	0.753999	Osmancik
12723	460.88	185.755	89.1693	0.877248	13302	0.674996	Osmancik
12190	440.682	185.856	83.8879	0.892342	12349	0.58398	Osmancik
9778	395.2	168.147	74.499	0.896492	9956	0.620589	Osmancik
12994	460.945	195.221	86.2117	0.897207	13196	0.815387	Osmancik
12482	448.539	185.09	87.2516	0.881919	12744	0.592688	Osmancik
12590	463.776	197.379	82.6857	0.908024	12880	0.606542	Osmancik
10369	402.983	159.287	84.8905	0.846153	10723	0.637543	Osmancik
10037	395.34	164.243	78.4998	0.878388	10210	0.764899	Osmancik
10964	417.987	171.39	82.6012	0.8762	11247	0.59668	Osmancik
12024	436.526	182.35	84.8828	0.885051	12235	0.626642	Osmancik
9753	402.579	170.614	73.3135	0.90297	10028	0.564214	Osmancik
11350	445.911	187.855	78.4088	0.908727	11771	0.670566	Osmancik
13693	474.752	198.116	89.0311	0.893336	14050	0.597634	Osmancik
12140	441.499	182.434	85.4982	0.883382	12358	0.589607	Osmancik
10249	404.089	165.682	80.3843	0.874419	10486	0.671449	Osmancik
8813	387.721	164.178	68.9861	0.907435	9005	0.737366	Osmancik
11889	426.647	172.268	89.4428	0.854648	12162	0.611574	Osmancik
10886	409.738	166.079	84.1343	0.862186	11055	0.680375	Osmancik
9772	392.237	164.403	76.1834	0.886153	9971	0.783389	Osmancik
11343	416.469	171.679	84.9017	0.869156	11492	0.734745	Osmancik
10792	416.629	171.382	81.6526	0.879209	11037	0.593685	Osmancik
10788	414.907	169.602	82.2502	0.874536	11083	0.648317	Osmancik
11626	420.789	168.47	89.0752	0.848789	11857	0.636344	Osmancik
9903	398.668	163.006	79.1322	0.874261	10152	0.594418	Osmancik
10445	405.596	167.459	80.5041	0.876863	10680	0.633875	Osmancik
9961	397.93	166.008	77.4436	0.884518	10130	0.627979	Osmancik
10694	405.677	163.367	84.6837	0.855161	10891	0.75014	Osmancik
11719	430.512	175.517	86.51	0.870094	12000	0.699308	Osmancik
12415	445.995	184.367	87.0412	0.881541	12719	0.657992	Osmancik
10587	399.635	166.365	81.329	0.872364	10723	0.637349	Osmancik
11725	427.14	174.794	86.7622	0.868112	11954	0.634264	Osmancik
11659	429.715	173.348	87.5478	0.863096	11912	0.608761	Osmancik
10733	402.419	166.234	82.7055	0.86745	10876	0.706118	Osmancik
12215	445.295	180.909	87.4059	0.875539	12448	0.588108	Osmancik
10727	420.365	174.385	79.6028	0.889735	11009	0.670605	Osmancik
11304	419.181	171.379	84.6748	0.869417	11504	0.720918	Osmancik
11321	424.576	173.998	84.7399	0.873392	11631	0.621896	Osmancik
10488	416.609	175.398	77.3137	0.89761	10720	0.71757	Osmancik
13002	465.18	191.297	87.9219	0.888121	13345	0.73574	Osmancik
11772	434.086	183.588	82.0858	0.894475	11937	0.650998	Osmancik
10951	415.139	173.758	81.3005	0.883784	11116	0.652272	Osmancik
11639	432.387	178.695	83.9545	0.882762	11940	0.593584	Osmancik
11580	428.709	173.488	86.6392	0.866374	11921	0.747772	Osmancik
10380	399.177	164.591	80.9596	0.87066	10630	0.706411	Osmancik
11329	419.405	173.39	84.3458	0.873708	11560	0.803247	Osmancik
11528	433.348	182.114	81.4973	0.89428	11777	0.785393	Osmancik
9428	398.92	164.845	74.6576	0.891564	9760	0.676715	Osmancik
11480	422.549	171.271	86.836	0.861941	11781	0.648221	Osmancik
10737	414.472	170.458	81.1703	0.879342	10986	0.611795	Osmancik
11144	410.344	164.094	87.6637	0.84534	11378	0.63383	Osmancik
11696	443.528	186.588	80.952	0.900983	11952	0.73913	Osmancik
11226	413.55	168.533	85.6277	0.861313	11424	0.772396	Osmancik
12478	439.222	176.344	91.2897	0.855574	12754	0.635822	Osmancik
12756	442.975	177.986	92.2292	0.855271	13028	0.70374	Osmancik
11769	426.31	176.115	85.9021	0.872976	11928	0.791193	Osmancik
11962	440.545	181.723	85.1972	0.883289	12283	0.622859	Osmancik
12734	462.233	188.156	87.7428	0.884611	13069	0.585202	Osmancik
10765	413.677	164.795	84.7912	0.857475	11127	0.608708	Osmancik
10926	416.223	173.42	80.8693	0.884616	11113	0.632365	Osmancik
11080	429.418	175.216	82.1778	0.883193	11277	0.569549	Osmancik
10536	412.507	162.72	84.6244	0.85413	10974	0.685938	Osmancik
10066	413.283	177.307	73.4882	0.910063	10262	0.546412	Osmancik
11398	431.74	179.467	81.8426	0.889964	11627	0.594017	Osmancik
11363	416.05	168.438	86.9082	0.85661	11594	0.630262	Osmancik
11074	426.525	182.832	77.6991	0.905205	11291	0.744821	Osmancik
10612	413.856	169.879	80.8968	0.879336	10924	0.671986	Osmancik
10846	418.852	172.207	81.6929	0.880316	11069	0.682739	Osmancik
12275	454.693	181.871	87.009	0.878137	12709	0.692681	Osmancik
13111	467.621	193.568	88.0679	0.890506	13456	0.619174	Osmancik
11327	423.168	169.295	86.5685	0.859375	11657	0.719997	Osmancik
10831	425.601	182.235	76.1952	0.908395	11017	0.588641	Osmancik
10878	423.793	179.847	77.7979	0.901596	11015	0.58016	Osmancik
11166	414.89	165.739	87.0306	0.851036	11478	0.670953	Osmancik
11280	420.101	170.67	85.4974	0.865476	11582	0.643175	Osmancik
8810	384.747	164.354	68.9016	0.907881	8987	0.587568	Osmancik
12742	446.811	180.02	91.0481	0.862671	12954	0.791085	Osmancik
10724	421.698	168.369	83.7353	0.867559	10988	0.594457	Osmancik
11277	417.977	166.913	87.6671	0.850962	11597	0.642601	Osmancik
11000	413.261	167.333	84.7378	0.862298	11158	0.793651	Osmancik
11678	423.676	173.414	86.4671	0.866823	11839	0.621104	Osmancik
11679	439.186	181.427	83.5257	0.887721	11949	0.567493	Osmancik
10756	420.086	170.637	81.5821	0.878304	10957	0.594977	Osmancik
10271	415.539	177.822	74.3963	0.908275	10422	0.566082	Osmancik
11740	440.564	181.204	83.4552	0.887629	12030	0.57901	Osmancik
10150	405.356	169.096	76.9323	0.89051	10358	0.636045	Osmancik
10691	407.087	163.292	84.5892	0.855366	10921	0.612104	Osmancik
11756	438.775	184.135	82.2666	0.894648	11969	0.65676	Osmancik
12504	445.587	182.379	88.633	0.873968	12781	0.798876	Osmancik
11440	425.816	170.721	87.2554	0.859521	11750	0.665078	Osmancik
10943	411.386	171.018	82.06	0.87736	11155	0.624779	Osmancik
12840	454.405	184.815	89.9216	0.873653	13185	0.726655	Osmancik
11546	429.524	175.659	84.9068	0.87542	11757	0.606312	Osmancik
10774	428.8	179.7	77.9218	0.901095	11033	0.716547	Osmancik
11392	427.572	173.079	85.3546	0.869943	11638	0.598476	Osmancik
10360	427.332	187.574	70.7258	0.926191	10525	0.543233	Osmancik
12075	430.471	176.183	88.5141	0.864636	12248	0.802326	Osmancik
10796	410.11	165.733	84.2488	0.861157	11060	0.68002	Osmancik
10549	414.445	170.021	80.4248	0.881047	10868	0.617117	Osmancik
10950	412.334	166.306	85.2982	0.858449	11172	0.776045	Osmancik
11923	437.939	185	83.1161	0.893393	12093	0.76234	Osmancik
12181	430.949	177.658	87.4951	0.870316	12353	0.756584	Osmancik
10898	414.811	170.235	82.5531	0.87455	11094	0.602732	Osmancik
11642	427.956	171.079	87.5687	0.859068	11946	0.736369	Osmancik
12170	441.477	181.888	86.5787	0.879445	12373	0.772551	Osmancik
11774	433.729	180.278	84.2235	0.884159	12036	0.797696	Osmancik
10842	412.749	167.045	84.0016	0.864363	11105	0.670501	Osmancik
11914	430.644	172.01	90.0544	0.852	12215	0.71633	Osmancik
11766	423.981	171.209	88.1125	0.857401	11954	0.639179	Osmancik
11293	424.624	178.363	81.414	0.889749	11473	0.746102	Osmancik
10222	423.497	182.8	72.1243	0.918873	10421	0.820385	Osmancik
13218	454.998	182.578	93.2371	0.859777	13459	0.733315	Osmancik
10693	408.704	167.524	82.5757	0.870076	10911	0.740923	Osmancik
9963	410.084	171.168	75.2315	0.898234	10251	0.719298	Osmancik
9028	390.442	165.496	69.9397	0.906313	9260	0.772284	Osmancik
10728	415.927	169.274	81.9969	0.874845	10996	0.5931	Osmancik
12558	439.776	173.443	93.3981	0.842628	12804	0.638889	Osmancik
12362	448.112	181.039	88.5261	0.87229	12720	0.63278	Osmancik
11242	418.646	172.53	83.8486	0.873962	11409	0.648889	Osmancik
11969	431.129	177.243	86.8384	0.871757	12135	0.60279	Osmancik
10085	412.135	172.962	75.2607	0.900369	10351	0.69831	Osmancik
13050	460.819	187.396	89.7935	0.877726	13379	0.595999	Osmancik
11618	434.177	179.415	83.3464	0.88555	11820	0.616765	Osmancik
11572	418.629	164.123	90.983	0.832279	11861	0.661635	Osmancik
10666	416.424	173.894	78.4574	0.892433	10825	0.594736	Osmancik
10182	404.849	168.119	77.8888	0.886204	10369	0.792744	Osmancik
9764	390.957	160.227	78.8616	0.87049	9956	0.648814	Osmancik
11856	431.863	174.352	88.6827	0.860979	12188	0.615065	Osmancik
12060	438.775	177.401	87.3778	0.870287	12420	0.648666	Osmancik
11765	429.335	174.331	86.8927	0.866928	11963	0.614681	Osmancik
15420	503.46	206.057	96.4173	0.883773	15800	0.584622	Osmancik
11101	418.033	169.873	84.6467	0.867008	11340	0.659596	Osmancik
10360	408.281	165.733	81.2866	0.871459	10649	0.785265	Osmancik
10392	416.489	177.366	75.5669	0.9047	10559	0.562459	Osmancik
9359	395.988	168.294	71.1074	0.906354	9555	0.57516	Osmancik
10367	413.96	176.567	75.2886	0.904533	10529	0.560378	Osmancik
11652	428.808	169.59	89.5738	0.849133	12067	0.737002	Osmancik
11211	410.576	162.871	88.5901	0.839133	11408	0.643423	Osmancik
11525	433.781	184.423	80.1666	0.900581	11697	0.612706	Osmancik
10908	414.997	174.449	80.5642	0.886973	11062	0.754983	Osmancik
12444	445.872	183.351	87.9073	0.87757	12630	0.604547	Osmancik
10442	407.282	166.142	81.0393	0.872971	10668	0.656234	Osmancik
13672	467.955	183.556	97.4687	0.847371	14027	0.615856	Osmancik
11297	418.953	172.967	84.4335	0.872762	11482	0.622939	Osmancik
12075	434.66	179.197	86.4907	0.87581	12229	0.603087	Osmancik
11274	425.055	173.38	83.8338	0.87533	11526	0.652771	Osmancik
11458	418.86	169.073	87.5214	0.855589	11668	0.757804	Osmancik
11675	429.13	173.418	86.8341	0.865609	11888	0.737337	Osmancik
11048	424.275	169.519	84.7781	0.865962	11419	0.691624	Osmancik
12624	451.757	188.236	86.356	0.888558	12878	0.809023	Osmancik
11540	427.523	172.795	86.4404	0.865882	11765	0.607113	Osmancik
12531	459.306	192.818	84.0254	0.900055	12846	0.561727	Osmancik
11480	432.824	174.962	85.0885	0.873779	11833	0.590839	Osmancik
11815	430.107	177.797	85.6786	0.876232	11993	0.706174	Osmancik
12469	446.841	191.387	83.2549	0.900426	12625	0.591452	Osmancik
11363	419.455	170.066	86.5057	0.860967	11699	0.694305	Osmancik
12661	436.922	174.832	93.0777	0.846504	12898	0.701985	Osmancik
11069	419.638	170.6	83.6085	0.871675	11333	0.659301	Osmancik
9843	383.116	154.95	81.3568	0.851071	10024	0.702269	Osmancik
12058	445.828	184.828	84.497	0.889382	12308	0.704816	Osmancik
12287	444.175	181.921	87.7392	0.87601	12508	0.653738	Osmancik
11693	424.504	176.024	84.9913	0.875709	11842	0.606735	Osmancik
11341	437.566	181.903	80.5767	0.896539	11669	0.766284	Osmancik
12960	460.867	191.518	86.7978	0.891404	13211	0.588235	Osmancik
12172	433.598	174.299	90.6949	0.853959	12401	0.638447	Osmancik
12396	443.154	184.802	86.4687	0.883782	12546	0.587099	Osmancik
12203	442.602	184.236	85.572	0.88559	12418	0.799044	Osmancik
13049	469.538	196.466	85.9948	0.899117	13409	0.727004	Osmancik
12507	458.65	184.417	88.1006	0.878509	12877	0.577264	Osmancik
10499	403.278	162.457	83.7551	0.856859	10749	0.744927	Osmancik
11543	431.763	179.598	82.5226	0.888186	11786	0.602642	Osmancik
12311	450.335	194.447	81.3193	0.908351	12441	0.556555	Osmancik
10563	408.973	167.471	81.0289	0.875157	10782	0.617358	Osmancik
12683	448.637	186.158	87.5586	0.882482	12847	0.590951	Osmancik
12665	445.663	186.28	87.287	0.883422	12811	0.710081	Osmancik
13818	467.896	189.285	94.4799	0.86652	14142	0.617454	Osmancik
12771	449.26	190.357	85.9255	0.892327	12939	0.77607	Osmancik
12213	450.219	188.317	83.7177	0.89575	12447	0.717989	Osmancik
11875	429.949	173.693	88.0417	0.862017	12128	0.78445	Osmancik
11846	437.347	182.629	82.913	0.891003	12019	0.579323	Osmancik
11952	443.491	181.768	85.3275	0.88297	12224	0.590135	Osmancik
10919	413.081	167.126	84.2186	0.863749	11120	0.639885	Osmancik
12023	442.335	181.177	85.415	0.881895	12282	0.6013	Osmancik
11953	443.518	183.426	84.5472	0.887434	12283	0.570712	Osmancik
12544	442.172	178.023	90.7576	0.860287	12835	0.770753	Osmancik
12045	438.394	182.436	85.0351	0.884727	12276	0.731285	Osmancik
12076	452.543	188.359	82.7944	0.898215	12367	0.705869	Osmancik
11773	433.981	174.717	87.2727	0.866309	12005	0.609463	Osmancik
11939	437.733	178.899	86.4424	0.875515	12204	0.638996	Osmancik
10191	419.579	174.734	75.5347	0.901738	10470	0.627331	Osmancik
12406	449.714	188.507	84.5177	0.893857	12602	0.798327	Osmancik
12249	456.249	188.551	84.3819	0.89427	12578	0.653419	Osmancik
11394	416.163	167.269	88.108	0.850024	11543	0.784225	Osmancik
11732	433.864	173.958	86.9747	0.86604	12054	0.629602	Osmancik
10260	417	172.994	76.9077	0.895744	10527	0.588235	Osmancik
11808	431.457	176.305	85.559	0.874353	12006	0.618349	Osmancik
12235	443.456	187.663	83.7517	0.894889	12442	0.658327	Osmancik
12084	433.505	171.523	91.33	0.846451	12356	0.701742	Osmancik
10873	416.041	170.913	82.1001	0.87707	11085	0.645359	Osmancik
12906	461.203	191.544	86.7274	0.891622	13272	0.73833	Osmancik
12539	442.297	178.601	90.3346	0.862657	12790	0.734478	Osmancik
11343	420.724	173.507	83.8277	0.875544	11512	0.609839	Osmancik
10613	423.329	172.113	79.7124	0.886285	10881	0.58697	Osmancik
11659	429.083	171.014	87.7889	0.858184	12017	0.630898	Osmancik
12671	448.838	180.471	90.6984	0.86454	12963	0.661602	Osmancik
10304	416.561	174.274	76.1844	0.899387	10541	0.61224	Osmancik
10928	410.94	171.746	81.3859	0.880593	11132	0.611186	Osmancik
12385	444.678	177.642	90.3332	0.861054	12724	0.736545	Osmancik
11682	423.374	168.399	89.3742	0.847543	11963	0.715809	Osmancik
13043	442.498	173.804	96.6975	0.830941	13278	0.647649	Osmancik
11116	419.714	173.077	82.3173	0.879656	11335	0.601645	Osmancik
12569	454.104	192.092	83.9365	0.899481	12811	0.566784	Osmancik
11081	414.079	169.009	84.3263	0.866633	11289	0.78992	Osmancik
11813	430.255	172.57	88.0268	0.860118	12088	0.717505	Osmancik
13111	457.018	188.334	90.1302	0.878052	13323	0.779442	Osmancik
13400	468.228	187.629	92.6911	0.869454	13756	0.599714	Osmancik
11154	427.222	174.318	82.1761	0.881911	11506	0.608577	Osmancik
10236	398.538	160.849	82.4916	0.858478	10392	0.795647	Osmancik
11342	429.781	179.138	81.868	0.889461	11532	0.578939	Osmancik
12445	440.577	184.655	86.3102	0.884039	12597	0.672303	Osmancik
10737	412.306	165.552	83.9219	0.861991	11017	0.614104	Osmancik
10897	420.555	168.119	83.563	0.867723	11174	0.640849	Osmancik
8499	370.446	156.072	70.6304	0.89174	8648	0.761559	Osmancik
12231	450.559	187.542	84.0381	0.893982	12504	0.707158	Osmancik
10841	419.1	166.865	84.3032	0.862992	11258	0.694758	Osmancik
10023	413.204	173.623	74.2406	0.90397	10221	0.579733	Osmancik
12959	455.267	181.21	92.4476	0.860074	13375	0.622191	Osmancik
11219	433.713	180.316	80.2534	0.895496	11485	0.700487	Osmancik
12759	455.315	188.191	87.0829	0.886496	13082	0.675079	Osmancik
12091	436.278	180.928	85.8791	0.880169	12303	0.620656	Osmancik
12263	444.954	180.221	87.5453	0.874089	12478	0.604506	Osmancik
11537	428.387	177.814	83.6527	0.882426	11733	0.744995	Osmancik
11601	416.646	165.781	89.8961	0.840212	11782	0.645217	Osmancik
10984	421.96	170.873	83.7595	0.871619	11201	0.695542	Osmancik
11065	416.084	172.181	82.1849	0.878732	11222	0.61788	Osmancik
11179	418.71	171.108	84.5664	0.869333	11440	0.735606	Osmancik
12188	435.861	182.033	85.7812	0.882005	12363	0.76577	Osmancik
11338	420.794	177.274	82.1395	0.886177	11481	0.820108	Osmancik
11718	427.146	164.748	93.1298	0.824895	12155	0.72031	Osmancik
11280	421.683	170.831	85.0552	0.867239	11510	0.605475	Osmancik
10841	413.46	170.965	81.6749	0.878507	11070	0.654492	Osmancik
10020	411.611	177.475	72.4375	0.912912	10217	0.547421	Osmancik
11490	421.167	167.71	88.5563	0.849225	11793	0.755424	Osmancik
10588	404.324	163.662	83.9692	0.85835	10756	0.614866	Osmancik
12303	439.341	184.3	85.2924	0.886467	12468	0.597465	Osmancik
12120	439.714	181.698	85.9925	0.880916	12335	0.602535	Osmancik
10286	406.713	171.051	77.4487	0.891621	10469	0.618446	Osmancik
11130	413.409	168.746	85.2848	0.862883	11320	0.788802	Osmancik
11802	430.052	175.275	86.6632	0.869211	12024	0.621256	Osmancik
8702	381.206	160.719	69.7333	0.900969	8924	0.641173	Osmancik
[truncated: 1,811 more rows]

## Sheet: Sheet2
DATASET: https://www.muratkoklu.com/datasets/ Reference: Cinar, I. and Koklu, M. (2019). Classification of Rice Varieties Using Artificial Intelligence Methods. International Journal of Intelligent Systems and Applications in Engineering, vol.7, no.3 (Sep. 2019), pp.188-194. https://doi.org/10.18201/ijisae.2019355381. (https://www.ijisae.org/IJISAE/article/view/1068)
